# Supplementary material
Source: publisher figshare collection journal article supplement (https://tandf.figshare.com/ndownloader/files/7738483)
Supplement: Supplementary file 1 [file 7738483]

## Sheet: WaterLevel
Time(s)	P1(cm)	P2(cm)	P3(cm)	P4(cm)	P5(cm)	P6(cm)	P7(cm)	P8(cm)	P9(cm)	P10(cm)
0	30.01	30	9.98	9.97	9.98	9.98	9.97	9.97	9.98	9.98
1	30.01	30	9.98	9.97	9.98	9.98	9.97	9.97	9.98	9.98
2	30.01	30	9.98	9.97	9.98	9.98	9.97	9.97	9.98	9.98
3	30.01	30	9.98	9.97	9.98	9.98	9.97	9.97	9.98	9.98
4	30.01	30	9.98	9.97	9.98	9.98	9.97	9.97	9.98	9.98
5	30.01	30	9.98	9.97	9.98	9.98	9.97	9.97	9.98	9.98
6	30.01	30	9.98	9.97	9.98	9.98	9.98	9.97	9.98	9.98
7	30.01	30	9.98	9.97	9.98	9.98	9.98	9.97	9.98	9.98
8	30.01	30	9.98	9.97	9.98	9.98	9.98	9.97	9.98	9.98
9	30.01	30	9.98	9.97	9.98	9.98	9.98	9.97	9.98	9.98
10	30.01	30	9.98	9.97	9.98	9.98	9.98	9.97	9.98	9.98
11	30.01	30	9.98	9.97	9.98	9.98	9.98	9.97	9.98	9.98
12	30.01	30	9.98	9.97	9.98	9.98	9.98	9.97	9.98	9.98
13	30.01	30	9.98	9.97	9.98	9.98	9.98	9.97	9.98	9.98
14	30.01	30	9.98	9.97	9.98	9.98	9.98	9.97	9.98	9.98
15	30.01	30	9.98	9.97	9.98	9.98	9.98	9.97	9.98	9.98
16	30.01	30	9.98	9.97	9.98	9.98	9.98	9.97	9.98	9.98
17	30.01	30	9.98	9.97	9.98	9.98	9.98	9.97	9.98	9.98
18	30.01	30	9.98	9.97	9.98	9.98	9.98	9.97	9.98	9.99
19	30.01	30	9.98	9.97	9.98	9.98	9.98	9.98	9.98	9.99
20	30.01	30	9.98	9.97	9.98	9.98	9.98	9.98	9.98	9.98
21	30.01	30	9.98	9.97	9.98	9.98	9.98	9.98	9.98	9.98
22	30.01	30	9.99	9.97	9.98	9.98	9.98	9.98	9.98	9.98
23	30.01	30	9.99	9.97	9.98	9.98	9.98	9.98	9.98	9.98
24	30.01	30	9.99	9.97	9.98	9.98	9.98	9.98	9.98	9.98
25	30.01	30	9.99	9.97	9.98	9.98	9.98	9.98	9.98	9.98
26	30.01	30	9.99	9.97	9.98	9.98	9.98	9.98	9.98	9.98
27	30.01	30	9.99	9.97	9.98	9.98	9.98	9.98	9.98	9.98
28	30.01	30	9.99	9.97	9.98	9.98	9.98	9.98	9.98	9.98
29	30.01	30	9.99	9.97	9.98	9.98	9.99	9.98	9.98	9.98
30	30.01	30	9.99	9.97	9.99	9.98	9.99	9.98	9.98	9.98
31	30.01	30	9.99	9.98	9.98	9.98	9.99	9.98	9.98	9.98
32	30.01	30	9.99	9.98	9.98	9.98	9.98	9.98	9.98	9.98
33	30.01	30	9.99	9.98	9.98	9.98	9.98	9.98	9.98	9.98
34	30.01	30	9.99	9.98	9.98	9.98	9.98	9.98	9.98	9.98
35	30.01	30	9.99	9.98	9.98	9.98	9.98	9.98	9.98	9.98
36	30.01	30	9.99	9.98	9.98	9.98	9.98	9.98	9.98	9.98
37	30.01	30	9.99	9.98	9.99	9.98	9.98	9.98	9.98	9.99
38	30.01	30	9.99	9.98	9.99	9.98	9.98	9.98	9.98	9.99
39	30.01	30	9.99	9.98	9.99	9.98	9.98	9.98	9.98	9.99
40	30.01	30	9.99	9.98	9.99	9.98	9.98	9.98	9.98	9.99
41	30.01	30	9.99	9.98	9.99	9.98	9.98	9.98	9.98	9.99
42	30.01	30	9.99	9.98	9.99	9.98	9.98	9.98	9.98	9.99
43	30.01	30	9.99	9.98	9.99	9.98	9.98	9.98	9.98	9.99
44	30.01	30	9.99	9.98	9.99	9.98	9.98	9.98	9.99	9.99
45	30.01	30	9.99	9.98	9.99	9.98	9.98	9.98	9.99	9.99
46	30.01	30	9.99	9.99	9.99	9.99	9.98	9.98	9.99	9.99
47	30.01	30	9.99	9.99	9.99	9.99	9.99	9.98	9.99	9.99
48	30.01	30	9.99	9.99	9.99	9.99	9.99	9.98	9.99	9.99
49	30.01	30	9.99	9.99	9.99	9.99	9.99	9.98	9.99	9.99
50	30.01	30	9.99	9.99	9.99	9.99	9.99	9.98	9.99	9.99
51	30.01	30	9.99	9.99	9.99	9.99	9.99	9.98	9.99	9.99
52	30.01	30	9.99	9.99	9.99	9.99	9.99	9.98	9.99	9.99
53	30.01	30	9.99	9.99	9.99	9.99	9.99	9.98	9.99	9.99
54	30.01	30	9.99	9.99	9.99	9.99	9.99	9.98	9.99	9.99
55	30.01	30	9.99	9.99	9.99	9.99	9.99	9.98	9.99	9.99
56	30.01	30	9.99	9.99	9.99	9.99	9.99	9.98	9.99	9.99
57	30.01	30	9.99	9.99	9.99	9.99	9.99	9.98	9.99	9.99
58	30	30	9.99	9.99	9.99	9.99	9.99	9.98	9.99	9.99
59	30	30	9.99	9.99	9.99	9.99	9.99	9.98	9.99	9.99
60	30	30	9.99	9.99	9.99	9.99	9.99	9.98	9.99	9.99
61	30	30	10	9.99	9.99	9.99	9.99	9.98	9.99	9.99
62	30	30	10	9.99	9.99	9.99	9.99	9.98	9.99	9.99
63	30	30	10	9.99	9.99	9.99	9.99	9.98	9.99	9.99
64	30	30	10	9.99	9.99	9.99	9.99	9.98	9.99	9.99
65	30	30	10	9.99	9.99	9.99	9.99	9.98	9.99	9.99
66	30	30	10	9.99	9.99	9.99	9.99	9.98	9.99	9.99
67	30	30	10	9.99	9.99	9.99	9.99	9.98	9.99	9.99
68	30	30	10	9.99	9.99	9.99	9.99	9.98	9.99	9.99
69	30	30	10	10	9.99	9.99	10	9.99	9.99	9.99
70	30	30	10	10	9.99	9.99	10	9.99	9.99	9.99
71	30	30	10	10	9.99	9.99	10	9.99	9.99	9.99
72	30	30	10	10	9.99	9.99	10	9.99	9.99	9.99
73	30	30	10	10	9.99	9.99	10	9.99	9.99	9.99
74	30	30	10	10	9.99	9.99	10	9.99	9.99	9.99
75	30	30	10	10	10	9.99	10	9.99	9.99	9.99
76	30	30	10	10	10	9.99	10	9.99	9.99	9.99
77	30	30	10	10	10	9.99	10	9.99	9.99	9.99
78	30	30	10	10	10	9.99	10	9.99	9.99	9.99
79	30	30	10	10	10	9.99	10	9.99	9.99	9.99
80	30	30	10	10	10	9.99	10	9.99	9.99	9.99
81	30	30	10	10	10	9.99	10	9.99	9.99	10
82	30	30	10	10	10	9.99	10	9.99	9.99	10
83	30	30	10	10	10	9.99	10	9.99	9.99	10
84	30	30	10	10	10	9.99	10	9.99	9.99	10
85	30	30	10	10	10	10	10	9.99	9.99	10
86	30	30	10	10	10	10	10	9.99	9.99	10
87	30	30	10	10	10	10	10	9.99	9.99	10
88	30	30	10	10	10	10	10	9.99	9.99	10
89	30	30	10	10	10	10	10	9.99	10	10
90	30	30	10	10	10	10	10	9.99	10	10
91	30	30	10	10	10	10	10	9.99	10	10
92	30	30	10	10	10	10	10	9.99	10	10
93	30	30	10	10	10	10	10	10	10	10
94	30	30	10	10	10	10	10	10	10	10
95	30	30	10	10	10	10	10	10	10	10
96	30	30	10	10	10	10	10.01	10	10	10
97	30	30	10	10	10	10	10	10	10	10
98	30	30	10	10	10	10	10	10	10	10
99	30	30	10	10	10	10	10	10	10	10
100	30	30	10	10	10	10	10	10	10	10
101	30	30	10	10.07	10	10.07	10	10	10	10
102	30	30	10	10.1	10.03	10.14	10.08	10	10	10
103	30	30.01	10	10.14	10.08	10.19	10.21	10	10	10
104	30	30.03	10	10.2	10.13	10.25	10.34	10.05	10	10
105	30.01	29.79	10	10.32	10.18	10.34	10.47	10.23	10.02	10
106	30.04	29.56	9.98	10.44	10.23	10.44	10.6	10.41	10.19	10
107	30.06	29.32	9.95	10.56	10.3	10.53	10.75	10.6	10.47	10
108	30.07	29.09	9.91	10.69	10.47	10.63	11.06	10.78	10.71	10.02
109	30.08	28.85	9.88	10.82	10.63	10.75	11.36	10.97	10.92	10.07
110	30.09	28.62	9.87	10.96	10.8	10.88	11.67	11.17	11.11	10.13
111	29.89	28.39	9.89	11.1	10.97	11.01	11.97	11.36	11.29	10.38
112	29.69	28.16	9.9	11.23	11.13	11.14	12.28	11.55	11.46	10.72
113	29.49	27.93	9.92	11.36	11.36	11.28	12.55	11.75	11.62	11.17
114	29.29	27.71	9.94	11.45	11.62	11.44	12.82	11.95	11.81	11.49
115	29.09	27.48	9.96	11.54	11.88	11.6	13.08	12.15	12.01	11.69
116	28.89	27.25	9.93	11.63	12.14	11.76	13.34	12.35	12.22	12.09
117	28.65	27	9.87	11.72	12.39	11.92	13.61	12.55	12.42	12.68
118	28.41	26.75	9.8	11.8	12.65	12.13	13.86	12.8	12.65	13.18
119	28.16	26.5	9.74	11.87	12.89	12.36	14.08	13.08	12.9	13.59
120	27.92	26.25	9.68	11.94	13.13	12.59	14.29	13.36	13.24	14.01
121	27.68	26	9.61	12.01	13.36	12.82	14.5	13.64	13.67	14.44
122	27.43	25.76	9.7	12.1	13.6	13.05	14.72	13.92	14.09	14.87
123	27.2	25.74	9.89	12.28	13.84	13.29	14.93	14.2	14.51	15.3
124	26.96	25.73	10.09	12.46	14.13	13.53	15.13	14.48	14.94	15.72
125	26.73	25.71	10.28	12.64	14.44	13.78	15.31	14.76	15.4	16.13
126	26.5	25.69	10.47	12.82	14.76	14.02	15.5	15.05	15.74	16.56
127	26.26	25.68	10.67	13.05	15.07	14.31	15.69	15.32	15.94	16.99
128	26.03	25.66	10.85	13.3	15.38	14.61	15.87	15.6	16.18	17.45
129	25.99	25.71	11.02	13.55	15.69	14.92	16.06	15.87	16.47	17.95
130	25.95	25.76	11.19	13.8	15.93	15.22	16.26	16.15	16.8	18.35
131	25.91	25.81	11.36	14.05	16.18	15.51	16.45	16.42	17.17	18.63
132	25.88	25.85	11.53	14.28	16.42	15.77	16.65	16.68	17.54	18.83
133	25.84	25.9	11.7	14.52	16.67	16.02	16.85	16.94	17.92	18.93
134	25.8	25.95	11.97	14.76	16.91	16.27	17.04	17.19	18.28	19.04
135	25.84	26.03	12.3	14.99	17.14	16.53	17.4	17.45	18.61	19.18
136	25.88	26.1	12.63	15.35	17.36	16.8	17.85	17.73	18.95	19.32
137	25.92	26.18	12.96	15.76	17.58	17.09	18.31	18.03	19.3	19.47
138	25.97	26.25	13.29	16.17	17.8	17.38	18.76	18.32	19.63	19.61
139	26.01	26.33	13.62	16.58	18.02	17.67	19.21	18.62	19.93	19.77
140	26.05	26.4	13.89	16.95	18.24	17.94	19.64	18.89	20.16	19.92
141	26.1	26.45	14.13	17.16	18.41	18.09	19.85	19.05	20.29	20.03
142	26.16	26.51	14.36	17.37	18.59	18.25	20.07	19.21	20.43	20.15
143	26.21	26.56	14.6	17.58	18.77	18.4	20.28	19.37	20.6	20.29
144	26.26	26.61	14.84	17.79	18.94	18.56	20.5	19.53	20.74	20.44
145	26.31	26.66	15.07	17.96	19.12	18.67	20.71	19.65	20.81	20.6
146	26.37	26.71	15.27	18.1	19.28	18.77	20.86	19.94	20.89	20.75
147	26.4	26.74	15.41	18.24	19.42	18.86	20.96	20.03	20.99	20.9
148	26.44	26.76	15.55	18.38	19.57	18.96	21.07	20.13	21.09	21.03
149	26.47	26.79	15.7	18.51	19.71	19.05	21.17	20.22	21.18	21.12
150	26.51	26.81	15.84	18.6	19.86	19.15	21.28	20.31	21.25	21.2
151	26.54	26.84	15.99	18.69	20	19.24	21.37	20.41	21.28	21.26
152	26.57	26.86	16.11	18.78	20.09	19.34	21.38	20.5	21.33	21.31
153	26.6	26.85	16.22	18.87	20.19	19.44	21.39	20.6	21.42	21.35
154	26.62	26.84	16.33	18.95	20.29	19.5	21.4	20.66	21.48	21.38
155	26.64	26.82	16.44	19.03	20.38	19.54	21.4	20.71	21.49	21.42
156	26.66	26.81	16.55	19.11	20.48	19.58	21.41	20.76	21.52	21.46
157	26.68	26.8	16.67	19.19	20.54	19.62	21.43	20.81	21.6	21.51
158	26.7	26.79	16.75	19.26	20.57	19.66	21.45	20.85	21.65	21.55
159	26.7	26.79	16.8	19.3	20.61	19.68	21.46	20.85	21.66	21.57
160	26.7	26.79	16.86	19.34	20.64	19.7	21.48	20.84	21.67	21.59
161	26.7	26.79	16.91	19.37	20.68	19.72	21.5	20.84	21.7	21.62
162	26.7	26.79	16.97	19.41	20.71	19.74	21.52	20.83	21.71	21.65
163	26.69	26.79	17.02	19.43	20.78	19.77	21.51	20.85	21.71	21.67
164	26.69	26.79	17.07	19.46	20.84	19.8	21.5	20.87	21.71	21.68
165	26.62	26.79	17.12	19.48	20.9	19.83	21.49	20.9	21.74	21.69
166	26.55	26.78	17.16	19.51	20.96	19.86	21.49	20.93	21.76	21.69
167	26.48	26.77	17.2	19.53	21.03	19.89	21.48	20.95	21.76	21.7
168	26.4	26.76	17.24	19.54	21.04	19.9	21.46	20.95	21.74	21.71
169	26.33	26.75	17.28	19.54	21.03	19.91	21.44	20.94	21.71	21.72
170	26.26	26.74	17.37	19.55	21.02	19.92	21.42	20.93	21.67	21.72
171	26.1	26.6	17.5	19.56	21	19.93	21.4	20.93	21.64	21.74
172	25.94	26.46	17.62	19.57	20.99	19.94	21.37	20.9	21.6	21.75
173	25.78	26.32	17.75	19.57	20.97	19.94	21.35	20.85	21.56	21.77
174	25.62	26.18	17.88	19.57	20.91	19.94	21.3	20.8	21.51	21.78
175	25.46	26.04	18	19.57	20.85	19.94	21.24	20.76	21.43	21.75
176	25.3	25.89	18.14	19.57	20.79	19.94	21.19	20.71	21.35	21.73
177	25.07	25.68	18.28	19.56	20.73	19.95	21.14	20.67	21.29	21.68
178	24.83	25.47	18.41	19.55	20.67	19.96	21.08	20.62	21.22	21.63
179	24.6	25.26	18.55	19.55	20.61	19.97	21.01	20.58	21.07	21.58
180	24.37	25.04	18.69	19.54	20.53	19.97	20.94	20.54	20.93	21.52
181	24.13	24.83	18.83	19.52	20.46	19.95	20.86	20.46	20.82	21.45
182	23.9	24.62	18.96	19.5	20.39	19.92	20.78	20.37	20.72	21.37
183	23.71	24.32	19.07	19.48	20.32	19.89	20.71	20.28	20.67	21.27
184	23.52	24.02	19.18	19.45	20.25	19.85	20.63	20.18	20.61	21.17
185	23.33	23.71	19.29	19.43	20.15	19.82	20.57	20.09	20.46	21.07
186	23.14	23.41	19.4	19.4	20.05	19.77	20.5	20.02	20.32	20.96
187	22.96	23.11	19.51	19.38	19.95	19.72	20.43	19.95	20.21	20.84
188	22.77	22.8	19.55	19.35	19.85	19.68	20.37	19.88	20.1	20.72
189	22.61	22.59	19.51	19.32	19.75	19.63	20.3	19.81	20	20.59
190	22.46	22.38	19.48	19.28	19.66	19.58	20.22	19.74	19.9	20.46
191	22.3	22.16	19.45	19.22	19.59	19.51	20.13	19.67	19.83	20.32
192	22.15	21.95	19.42	19.17	19.52	19.45	20.04	19.6	19.76	20.19
193	21.99	21.74	19.39	19.11	19.45	19.39	19.95	19.56	19.67	20.05
194	21.84	21.53	19.34	19.06	19.38	19.33	19.86	19.54	19.59	19.91
195	21.76	21.43	19.27	19.01	19.31	19.27	19.77	19.53	19.51	19.8
196	21.68	21.35	19.2	18.97	19.25	19.21	19.71	19.51	19.43	19.69
197	21.61	21.26	19.14	18.92	19.19	19.15	19.64	19.44	19.34	19.59
198	21.54	21.17	19.07	18.87	19.13	19.09	19.58	19.36	19.26	19.48
199	21.46	21.09	19	18.82	19.06	19.03	19.52	19.3	19.19	19.4
200	21.39	21	18.93	18.76	19	18.96	19.46	19.24	19.12	19.31
201	21.37	20.99	18.87	18.7	18.95	18.9	19.41	19.18	19.07	19.23
202	21.36	20.98	18.8	18.63	18.9	18.83	19.36	19.13	19.02	19.16
203	21.35	20.97	18.74	18.57	18.85	18.77	19.32	19.07	18.97	19.1
204	21.34	20.96	18.67	18.52	18.8	18.73	19.27	19.04	18.93	19.04
205	21.33	20.95	18.6	18.47	18.75	18.69	19.23	19	18.9	19
206	21.32	20.94	18.56	18.41	18.7	18.65	19.18	18.97	18.87	18.97
207	21.33	20.99	18.55	18.36	18.66	18.61	19.17	18.94	18.84	18.94
208	21.34	21.04	18.53	18.31	18.62	18.56	19.15	18.91	18.82	18.91
209	21.35	21.09	18.52	18.27	18.58	18.52	19.14	18.89	18.81	18.89
210	21.37	21.14	18.5	18.23	18.54	18.47	19.12	18.88	18.79	18.87
211	21.38	21.18	18.49	18.18	18.5	18.43	19.11	18.86	18.79	18.87
212	21.39	21.23	18.47	18.14	18.48	18.38	19.11	18.84	18.78	18.87
213	21.4	21.29	18.45	18.12	18.46	18.37	19.11	18.85	18.78	18.88
214	21.4	21.34	18.44	18.1	18.44	18.36	19.12	18.86	18.78	18.88
215	21.4	21.39	18.42	18.08	18.43	18.35	19.13	18.86	18.79	18.89
216	21.41	21.44	18.4	18.06	18.41	18.34	19.14	18.87	18.8	18.9
217	21.41	21.49	18.38	18.05	18.4	18.32	19.15	18.87	18.82	18.92
218	21.42	21.54	18.37	18.04	18.39	18.31	19.15	18.87	18.83	18.94
219	21.41	21.56	18.36	18.03	18.38	18.3	19.16	18.88	18.85	18.96
220	21.4	21.57	18.36	18.02	18.37	18.29	19.17	18.88	18.87	18.97
221	21.38	21.59	18.36	18.01	18.36	18.27	19.17	18.88	18.88	19
222	21.37	21.6	18.36	18.01	18.36	18.27	19.18	18.88	18.9	19.02
223	21.36	21.61	18.35	18.02	18.35	18.27	19.18	18.89	18.92	19.05
224	21.35	21.63	18.35	18.03	18.36	18.27	19.17	18.9	18.94	19.07
225	21.34	21.6	18.33	18.03	18.37	18.27	19.16	18.9	18.95	19.08
226	21.34	21.56	18.32	18.04	18.37	18.28	19.16	18.9	18.95	19.1
227	21.33	21.53	18.3	18.05	18.38	18.28	19.15	18.9	18.95	19.1
228	21.33	21.49	18.28	18.06	18.38	18.29	19.14	18.89	18.96	19.1
229	21.32	21.46	18.27	18.07	18.39	18.3	19.14	18.89	18.95	19.11
230	21.31	21.42	18.26	18.08	18.39	18.3	19.13	18.88	18.94	19.11
231	21.3	21.39	18.26	18.09	18.39	18.31	19.12	18.88	18.93	19.11
232	21.28	21.37	18.26	18.1	18.4	18.32	19.11	18.88	18.92	19.1
233	21.26	21.34	18.26	18.11	18.4	18.33	19.11	18.87	18.92	19.1
234	21.24	21.32	18.26	18.12	18.41	18.34	19.1	18.87	18.92	19.09
235	21.22	21.29	18.26	18.13	18.43	18.34	19.1	18.86	18.92	19.08
236	21.2	21.27	18.26	18.14	18.44	18.34	19.1	18.86	18.9	19.06
237	21.16	21.25	18.27	18.14	18.46	18.35	19.1	18.85	18.89	19.05
238	21.13	21.23	18.28	18.15	18.47	18.35	19.1	18.85	18.88	19.04
239	21.09	21.22	18.29	18.15	18.49	18.35	19.1	18.84	18.88	19.02
240	21.05	21.2	18.29	18.14	18.48	18.35	19.09	18.83	18.87	19.01
241	21.01	21.18	18.3	18.14	18.48	18.34	19.08	18.82	18.86	19
242	20.97	21.17	18.3	18.13	18.47	18.34	19.07	18.81	18.85	19
243	20.93	21.13	18.29	18.12	18.47	18.33	19.06	18.79	18.83	18.99
244	20.88	21.09	18.28	18.1	18.46	18.32	19.05	18.77	18.8	18.99
245	20.84	21.05	18.27	18.09	18.45	18.3	19.03	18.75	18.78	18.98
246	20.79	21.01	18.25	18.07	18.44	18.28	19.01	18.73	18.75	18.97
247	20.75	20.97	18.24	18.05	18.42	18.26	18.99	18.7	18.73	18.96
248	20.7	20.93	18.23	18.03	18.41	18.24	18.97	18.68	18.71	18.95
249	20.63	20.86	18.21	18.01	18.39	18.23	18.94	18.66	18.68	18.94
250	20.55	20.79	18.19	18	18.38	18.22	18.92	18.64	18.65	18.92
251	20.48	20.72	18.17	17.99	18.36	18.21	18.9	18.62	18.62	18.9
252	20.4	20.65	18.15	17.97	18.34	18.2	18.87	18.6	18.6	18.87
253	20.32	20.58	18.13	17.95	18.32	18.19	18.84	18.58	18.56	18.83
254	20.24	20.51	18.11	17.93	18.3	18.17	18.81	18.54	18.52	18.79
255	20.17	20.42	18.08	17.91	18.28	18.15	18.78	18.5	18.48	18.75
256	20.09	20.34	18.05	17.89	18.26	18.13	18.74	18.46	18.44	18.72
257	20.01	20.26	18.01	17.87	18.22	18.11	18.69	18.42	18.4	18.68
258	19.93	20.18	17.98	17.84	18.18	18.08	18.63	18.39	18.36	18.65
259	19.85	20.09	17.95	17.81	18.14	18.05	18.58	18.35	18.31	18.61
260	19.78	20.01	17.92	17.79	18.1	18.02	18.52	18.32	18.26	18.56
261	19.71	19.92	17.89	17.76	18.06	17.98	18.47	18.28	18.21	18.51
262	19.64	19.83	17.86	17.73	18.02	17.95	18.42	18.25	18.16	18.46
263	19.56	19.74	17.83	17.71	17.99	17.93	18.38	18.21	18.11	18.4
264	19.49	19.66	17.8	17.69	17.95	17.9	18.34	18.18	18.06	18.35
265	19.42	19.57	17.76	17.67	17.91	17.87	18.29	18.14	18.01	18.3
266	19.35	19.48	17.74	17.65	17.87	17.84	18.25	18.1	17.96	18.24
267	19.28	19.4	17.71	17.62	17.83	17.81	18.2	18.06	17.91	18.19
268	19.21	19.32	17.69	17.58	17.79	17.77	18.15	18.02	17.86	18.14
269	19.14	19.24	17.67	17.55	17.75	17.73	18.09	17.98	17.81	18.09
270	19.07	19.17	17.65	17.51	17.71	17.69	18.04	17.94	17.77	18.04
271	19	19.09	17.63	17.48	17.68	17.66	17.99	17.89	17.72	17.99
272	18.93	19.01	17.6	17.45	17.64	17.62	17.93	17.85	17.67	17.94
273	18.88	18.95	17.55	17.41	17.6	17.58	17.89	17.81	17.62	17.9
274	18.84	18.89	17.51	17.38	17.56	17.55	17.86	17.77	17.57	17.85
275	18.8	18.83	17.47	17.35	17.52	17.51	17.82	17.73	17.53	17.8
276	18.76	18.76	17.43	17.31	17.48	17.47	17.79	17.69	17.48	17.75
277	18.72	18.7	17.38	17.28	17.45	17.44	17.75	17.65	17.43	17.7
278	18.68	18.64	17.35	17.24	17.41	17.4	17.71	17.62	17.39	17.65
279	18.66	18.6	17.32	17.2	17.38	17.37	17.67	17.58	17.35	17.61
280	18.64	18.57	17.29	17.17	17.35	17.33	17.63	17.54	17.31	17.56
281	18.62	18.53	17.26	17.15	17.32	17.31	17.6	17.51	17.28	17.51
282	18.6	18.49	17.23	17.12	17.29	17.28	17.56	17.48	17.24	17.47
283	18.58	18.46	17.2	17.1	17.26	17.26	17.52	17.45	17.21	17.43
284	18.56	18.42	17.18	17.08	17.24	17.23	17.5	17.42	17.18	17.39
285	18.54	18.41	17.16	17.05	17.22	17.2	17.48	17.4	17.15	17.35
286	18.53	18.4	17.13	17.02	17.2	17.17	17.46	17.37	17.13	17.32
287	18.51	18.39	17.11	16.99	17.18	17.14	17.44	17.34	17.11	17.29
288	18.5	18.39	17.09	16.96	17.15	17.11	17.41	17.32	17.09	17.26
289	18.48	18.38	17.07	16.93	17.13	17.09	17.4	17.29	17.07	17.24
290	18.47	18.38	17.05	16.91	17.11	17.07	17.38	17.27	17.05	17.22
291	18.45	18.38	17.03	16.89	17.09	17.05	17.37	17.25	17.03	17.2
292	18.43	18.38	17.01	16.87	17.07	17.03	17.35	17.24	17.02	17.19
293	18.41	18.39	16.99	16.85	17.05	17.01	17.33	17.22	17	17.18
294	18.39	18.39	16.98	16.83	17.03	16.99	17.32	17.2	16.99	17.17
295	18.37	18.39	16.96	16.8	17.01	16.97	17.31	17.19	16.98	17.17
296	18.35	18.4	16.95	16.78	17	16.95	17.3	17.18	16.97	17.16
297	18.33	18.39	16.94	16.76	16.99	16.92	17.28	17.17	16.97	17.16
298	18.31	18.39	16.93	16.75	16.98	16.91	17.27	17.15	16.96	17.16
299	18.29	18.38	16.91	16.74	16.96	16.9	17.26	17.14	16.95	17.16
300	18.27	18.38	16.9	16.73	16.95	16.88	17.25	17.13	16.95	17.16
301	18.24	18.37	16.89	16.72	16.94	16.87	17.24	17.12	16.94	17.16
302	18.22	18.36	16.88	16.71	16.92	16.86	17.23	17.11	16.93	17.16
303	18.2	18.34	16.87	16.7	16.91	16.86	17.22	17.1	16.92	17.16
304	18.18	18.32	16.85	16.69	16.89	16.86	17.21	17.09	16.92	17.16
305	18.16	18.29	16.84	16.69	16.88	16.85	17.2	17.08	16.91	17.16
306	18.15	18.27	16.83	16.68	16.87	16.85	17.2	17.07	16.9	17.15
307	18.13	18.24	16.81	16.67	16.87	16.84	17.19	17.06	16.89	17.15
308	18.11	18.21	16.8	16.67	16.86	16.83	17.18	17.05	16.88	17.14
309	18.09	18.2	16.8	16.67	16.85	16.83	17.18	17.05	16.87	17.13
310	18.07	18.18	16.79	16.67	16.84	16.82	17.17	17.05	16.85	17.12
311	18.05	18.16	16.79	16.67	16.83	16.81	17.16	17.04	16.84	17.11
312	18.03	18.14	16.78	16.67	16.83	16.81	17.16	17.04	16.83	17.09
313	18.01	18.12	16.78	16.66	16.82	16.81	17.15	17.03	16.82	17.08
314	17.99	18.1	16.77	16.66	16.81	16.81	17.14	17.03	16.82	17.06
315	17.97	18.09	16.76	16.65	16.81	16.81	17.13	17.02	16.81	17.05
316	17.95	18.07	16.75	16.65	16.8	16.8	17.13	17.02	16.8	17.03
317	17.93	18.05	16.74	16.64	16.79	16.8	17.12	17.01	16.79	17.02
318	17.91	18.03	16.72	16.63	16.78	16.8	17.1	17	16.78	17.01
319	17.89	18.01	16.71	16.62	16.76	16.79	17.09	16.99	16.77	17
320	17.87	17.99	16.7	16.61	16.75	16.79	17.08	16.98	16.77	16.99
321	17.85	17.96	16.69	16.6	16.74	16.77	17.07	16.97	16.76	16.98
322	17.83	17.94	16.68	16.58	16.73	16.75	17.05	16.96	16.75	16.97
323	17.8	17.91	16.66	16.57	16.71	16.74	17.03	16.94	16.74	16.96
324	17.78	17.89	16.65	16.55	16.7	16.72	17.01	16.93	16.72	16.95
325	17.76	17.86	16.64	16.54	16.68	16.7	16.99	16.92	16.71	16.94
326	17.74	17.83	16.62	16.53	16.66	16.69	16.97	16.91	16.69	16.92
327	17.71	17.81	16.61	16.52	16.65	16.68	16.95	16.9	16.68	16.91
328	17.68	17.79	16.6	16.51	16.64	16.67	16.93	16.89	16.65	16.9
329	17.65	17.76	16.58	16.5	16.62	16.66	16.91	16.88	16.63	16.88
330	17.63	17.74	16.57	16.49	16.61	16.64	16.9	16.86	16.63	16.86
331	17.6	17.72	16.56	16.48	16.59	16.62	16.88	16.74	16.62	16.84
332	17.57	17.7	16.54	16.46	16.58	16.6	16.86	16.73	16.59	16.83
333	17.54	17.67	16.53	16.45	16.57	16.58	16.84	16.71	16.57	16.81
334	17.52	17.64	16.51	16.44	16.56	16.57	16.82	16.69	16.55	16.79
335	17.49	17.61	16.49	16.43	16.55	16.55	16.8	16.67	16.53	16.77
336	17.47	17.58	16.48	16.41	16.54	16.53	16.78	16.66	16.51	16.76
337	17.44	17.55	16.46	16.4	16.52	16.52	16.76	16.64	16.49	16.74
338	17.41	17.52	16.45	16.39	16.51	16.5	16.74	16.62	16.46	16.72
339	17.38	17.49	16.43	16.37	16.5	16.48	16.72	16.6	16.43	16.7
340	17.35	17.46	16.41	16.35	16.48	16.46	16.71	16.58	16.41	16.68
341	17.31	17.43	16.4	16.33	16.47	16.44	16.69	16.56	16.39	16.66
342	17.28	17.4	16.38	16.31	16.45	16.42	16.67	16.54	16.37	16.64
343	17.25	17.37	16.36	16.29	16.44	16.4	16.66	16.52	16.35	16.61
344	17.21	17.35	16.34	16.28	16.42	16.39	16.64	16.5	16.33	16.59
345	17.18	17.32	16.33	16.26	16.4	16.37	16.61	16.48	16.31	16.57
346	17.15	17.29	16.31	16.24	16.37	16.36	16.58	16.46	16.29	16.55
347	17.11	17.26	16.29	16.22	16.35	16.34	16.56	16.44	16.27	16.53
348	17.08	17.23	16.27	16.2	16.33	16.32	16.53	16.41	16.25	16.51
349	17.04	17.21	16.25	16.17	16.31	16.3	16.51	16.39	16.22	16.49
350	17.01	17.18	16.23	16.14	16.28	16.27	16.48	16.37	16.2	16.46
351	16.98	17.14	16.2	16.11	16.26	16.25	16.45	16.34	16.18	16.44
352	16.95	17.11	16.18	16.09	16.24	16.23	16.43	16.32	16.15	16.42
353	16.93	17.07	16.15	16.07	16.21	16.21	16.4	16.3	16.13	16.4
354	16.9	17.03	16.13	16.05	16.19	16.19	16.38	16.28	16.1	16.38
355	16.87	16.99	16.1	16.03	16.17	16.17	16.35	16.25	16.08	16.35
356	16.85	16.95	16.08	16.02	16.14	16.15	16.33	16.23	16.05	16.33
357	16.82	16.92	16.06	16	16.12	16.12	16.31	16.21	16.03	16.3
358	16.8	16.88	16.04	15.97	16.1	16.1	16.28	16.18	16	16.28
359	16.77	16.85	16.02	15.95	16.07	16.08	16.26	16.16	15.98	16.25
360	16.75	16.81	16	15.93	16.05	16.06	16.24	16.14	15.96	16.22
361	16.72	16.78	15.98	15.91	16.03	16.03	16.21	16.12	15.94	16.19
362	16.7	16.75	15.97	15.9	16.01	16.02	16.19	16.1	15.93	16.17
363	16.67	16.72	15.96	15.88	15.99	16	16.17	16.08	15.93	16.14
364	16.65	16.7	15.94	15.87	15.97	15.98	16.14	16.06	15.92	16.11
365	16.63	16.68	15.93	15.86	15.95	15.97	16.12	16.04	15.91	16.08
366	16.61	16.66	15.92	15.84	15.94	15.95	16.1	16.02	15.89	16.06
367	16.59	16.64	15.91	15.82	15.92	15.93	16.08	16	15.87	16.03
368	16.57	16.62	15.89	15.81	15.9	15.91	16.06	15.98	15.85	16.01
369	16.55	16.6	15.88	15.79	15.89	15.89	16.05	15.96	15.83	15.98
370	16.53	16.58	15.86	15.78	15.87	15.87	16.03	15.94	15.81	15.96
371	16.52	16.56	15.84	15.76	15.85	15.85	16.01	15.93	15.79	15.94
372	16.5	16.54	15.82	15.75	15.83	15.84	15.99	15.91	15.77	15.92
373	16.49	16.52	15.81	15.73	15.82	15.83	15.97	15.89	15.75	15.9
374	16.47	16.5	15.79	15.72	15.8	15.81	15.95	15.87	15.73	15.88
375	16.45	16.48	15.78	15.7	15.78	15.8	15.93	15.86	15.71	15.87
376	16.43	16.46	15.76	15.69	15.76	15.78	15.91	15.84	15.7	15.85
377	16.41	16.45	15.75	15.67	15.75	15.76	15.89	15.83	15.68	15.83
378	16.39	16.43	15.74	15.65	15.73	15.74	15.88	15.82	15.67	15.82
379	16.37	16.41	15.72	15.64	15.72	15.73	15.87	15.8	15.66	15.81
380	16.35	16.4	15.71	15.63	15.7	15.71	15.85	15.79	15.64	15.79
381	16.33	16.38	15.69	15.62	15.69	15.7	15.84	15.78	15.63	15.78
382	16.32	16.37	15.67	15.61	15.68	15.69	15.83	15.77	15.62	15.77
383	16.3	16.35	15.65	15.6	15.66	15.68	15.81	15.75	15.61	15.76
384	16.28	16.34	15.63	15.58	15.65	15.66	15.8	15.74	15.59	15.75
385	16.27	16.33	15.61	15.57	15.63	15.65	15.78	15.73	15.58	15.73
386	16.25	16.31	15.59	15.55	15.62	15.63	15.77	15.72	15.57	15.72
387	16.24	16.3	15.58	15.53	15.61	15.62	15.75	15.7	15.56	15.71
388	16.22	16.28	15.57	15.52	15.59	15.6	15.74	15.69	15.55	15.7
389	16.2	16.26	15.56	15.51	15.58	15.59	15.73	15.68	15.54	15.69
390	16.19	16.25	15.55	15.5	15.57	15.58	15.72	15.67	15.52	15.68
391	16.17	16.23	15.53	15.49	15.56	15.58	15.71	15.66	15.51	15.67
392	16.16	16.21	15.52	15.48	15.55	15.57	15.7	15.65	15.5	15.66
393	16.14	16.2	15.51	15.47	15.53	15.56	15.69	15.64	15.49	15.65
394	16.13	16.19	15.51	15.46	15.53	15.55	15.68	15.63	15.48	15.64
395	16.11	16.18	15.5	15.45	15.52	15.53	15.67	15.62	15.47	15.63
396	16.1	16.16	15.49	15.44	15.51	15.52	15.66	15.61	15.46	15.62
397	16.08	16.15	15.48	15.43	15.5	15.51	15.65	15.59	15.45	15.6
398	16.07	16.14	15.47	15.42	15.49	15.5	15.64	15.57	15.44	15.59
399	16.05	16.13	15.46	15.41	15.48	15.5	15.63	15.54	15.43	15.58
400	16.04	16.12	15.45	15.4	15.47	15.49	15.62	15.5	15.42	15.57
401	16.02	16.1	15.44	15.39	15.46	15.48	15.61	15.46	15.41	15.56
402	16.01	16.09	15.43	15.37	15.44	15.47	15.6	15.45	15.4	15.55
403	15.99	16.08	15.42	15.36	15.43	15.45	15.59	15.43	15.39	15.54
404	15.97	16.07	15.41	15.35	15.42	15.44	15.57	15.42	15.38	15.53
405	15.96	16.05	15.4	15.33	15.41	15.42	15.56	15.41	15.37	15.52
406	15.95	16.04	15.38	15.32	15.39	15.41	15.55	15.4	15.36	15.51
407	15.93	16.02	15.37	15.31	15.38	15.4	15.53	15.38	15.34	15.5
408	15.92	16	15.36	15.3	15.37	15.39	15.52	15.37	15.33	15.49
409	15.91	15.99	15.35	15.29	15.35	15.38	15.5	15.36	15.32	15.48
410	15.89	15.97	15.34	15.28	15.34	15.37	15.49	15.35	15.31	15.47
411	15.88	15.96	15.33	15.27	15.32	15.36	15.48	15.34	15.3	15.46
412	15.87	15.94	15.32	15.25	15.31	15.35	15.47	15.33	15.29	15.44
413	15.85	15.93	15.31	15.24	15.29	15.33	15.46	15.32	15.28	15.42
414	15.84	15.91	15.3	15.23	15.28	15.32	15.45	15.31	15.27	15.4
415	15.83	15.9	15.29	15.22	15.27	15.31	15.44	15.3	15.26	15.39
416	15.82	15.89	15.29	15.21	15.25	15.3	15.43	15.29	15.25	15.38
417	15.8	15.87	15.27	15.2	15.24	15.3	15.41	15.28	15.24	15.36
418	15.79	15.86	15.26	15.19	15.23	15.29	15.4	15.26	15.23	15.35
419	15.77	15.85	15.25	15.19	15.21	15.28	15.39	15.25	15.21	15.34
420	15.76	15.84	15.24	15.18	15.2	15.27	15.37	15.24	15.2	15.33
421	15.74	15.83	15.23	15.16	15.19	15.26	15.36	15.23	15.19	15.32
422	15.73	15.82	15.22	15.15	15.18	15.25	15.35	15.22	15.18	15.31
423	15.71	15.8	15.21	15.14	15.17	15.24	15.34	15.21	15.17	15.3
424	15.7	15.79	15.2	15.13	15.16	15.23	15.33	15.2	15.16	15.29
425	15.68	15.77	15.19	15.12	15.15	15.22	15.32	15.19	15.14	15.28
426	15.67	15.76	15.17	15.11	15.13	15.21	15.31	15.17	15.13	15.27
427	15.65	15.74	15.16	15.1	15.13	15.2	15.3	15.16	15.13	15.26
428	15.64	15.73	15.15	15.09	15.12	15.19	15.28	15.15	15.12	15.25
429	15.62	15.71	15.14	15.08	15.11	15.18	15.27	15.14	15.1	15.24
430	15.61	15.7	15.13	15.07	15.1	15.17	15.26	15.13	15.09	15.23
431	15.59	15.68	15.12	15.06	15.1	15.15	15.25	15.12	15.08	15.22
432	15.58	15.67	15.11	15.05	15.09	15.14	15.24	15.1	15.07	15.21
433	15.56	15.65	15.1	15.04	15.08	15.13	15.23	15.09	15.06	15.2
434	15.55	15.63	15.09	15.03	15.07	15.12	15.21	15.08	15.05	15.18
435	15.53	15.62	15.07	15.02	15.06	15.11	15.2	15.07	15.04	15.17
436	15.52	15.6	15.06	15.01	15.06	15.1	15.19	15.06	15.02	15.16
437	15.5	15.59	15.05	15	15.05	15.09	15.18	15.05	15.01	15.15
438	15.49	15.57	15.03	14.99	15.04	15.07	15.17	15.04	15	15.14
439	15.47	15.56	15.02	14.98	15.03	15.06	15.15	15.02	14.99	15.12
440	15.45	15.54	15.01	14.97	15.01	15.04	15.14	15.01	14.97	15.11
441	15.44	15.53	15	14.96	15	15.03	15.12	15	14.96	15.1
442	15.42	15.51	14.99	14.95	14.99	15.01	15.11	14.99	14.95	15.08
443	15.4	15.49	14.97	14.94	14.98	15.01	15.1	14.98	14.94	15.07
444	15.39	15.48	14.96	14.93	14.97	15	15.08	14.97	14.92	15.06
445	15.37	15.46	14.95	14.92	14.96	14.99	15.07	14.95	14.91	15.04
446	15.35	15.45	14.94	14.91	14.95	14.98	15.06	14.94	14.9	15.03
447	15.34	15.43	14.93	14.9	14.94	14.96	15.05	14.93	14.89	15.01
448	15.32	15.41	14.91	14.89	14.92	14.95	15.04	14.92	14.87	15
449	15.31	15.4	14.9	14.88	14.91	14.93	15.02	14.91	14.86	14.99
450	15.3	15.38	14.89	14.86	14.9	14.92	15.01	14.9	14.85	14.97
451	15.28	15.37	14.87	14.85	14.89	14.9	15	14.89	14.83	14.96
452	15.27	15.35	14.86	14.84	14.88	14.89	14.98	14.87	14.82	14.95
453	15.25	15.33	14.85	14.83	14.86	14.88	14.97	14.86	14.81	14.93
454	15.24	15.32	14.84	14.82	14.85	14.87	14.95	14.85	14.79	14.92
455	15.23	15.31	14.83	14.81	14.84	14.85	14.94	14.84	14.78	14.91
456	15.21	15.29	14.82	14.79	14.83	14.84	14.93	14.82	14.77	14.9
457	15.2	15.28	14.81	14.78	14.82	14.83	14.92	14.81	14.75	14.88
458	15.18	15.26	14.8	14.77	14.8	14.82	14.91	14.8	14.74	14.87
459	15.17	15.25	14.79	14.75	14.79	14.8	14.9	14.79	14.73	14.86
460	15.15	15.23	14.77	14.74	14.78	14.79	14.88	14.77	14.71	14.84
461	15.14	15.22	14.76	14.73	14.77	14.78	14.87	14.76	14.7	14.83
462	15.12	15.2	14.75	14.72	14.76	14.77	14.85	14.75	14.69	14.82
463	15.11	15.19	14.74	14.71	14.75	14.76	14.84	14.74	14.68	14.8
464	15.1	15.17	14.72	14.7	14.73	14.75	14.83	14.73	14.67	14.79
465	15.08	15.16	14.71	14.69	14.72	14.74	14.81	14.72	14.65	14.78
466	15.07	15.14	14.7	14.68	14.71	14.73	14.8	14.71	14.64	14.77
467	15.06	15.13	14.69	14.66	14.7	14.71	14.79	14.7	14.63	14.75
468	15.05	15.12	14.68	14.65	14.69	14.7	14.78	14.69	14.62	14.74
469	15.04	15.1	14.67	14.64	14.68	14.69	14.77	14.68	14.61	14.73
470	15.03	15.09	14.66	14.63	14.67	14.68	14.76	14.66	14.6	14.72
471	15.02	15.08	14.65	14.62	14.66	14.67	14.75	14.65	14.59	14.7
472	15.01	15.07	14.64	14.61	14.65	14.66	14.74	14.64	14.58	14.69
473	15	15.06	14.63	14.6	14.64	14.65	14.72	14.63	14.58	14.68
474	14.99	15.05	14.62	14.59	14.63	14.64	14.71	14.62	14.58	14.67
475	14.97	15.04	14.61	14.57	14.62	14.63	14.7	14.61	14.57	14.66
476	14.96	15.03	14.6	14.56	14.61	14.62	14.69	14.6	14.57	14.65
477	14.95	15.02	14.59	14.55	14.6	14.6	14.68	14.59	14.57	14.64
478	14.94	15.01	14.58	14.54	14.59	14.59	14.67	14.58	14.57	14.63
479	14.93	15	14.56	14.53	14.58	14.58	14.66	14.57	14.56	14.62
480	14.92	14.99	14.55	14.52	14.57	14.57	14.65	14.56	14.55	14.61
481	14.91	14.98	14.54	14.51	14.56	14.56	14.64	14.55	14.54	14.6
482	14.89	14.97	14.53	14.5	14.55	14.55	14.63	14.54	14.53	14.59
483	14.88	14.96	14.52	14.49	14.54	14.54	14.62	14.53	14.53	14.58
484	14.87	14.95	14.51	14.48	14.53	14.53	14.61	14.53	14.52	14.57
485	14.86	14.94	14.5	14.47	14.52	14.53	14.6	14.52	14.52	14.56
486	14.85	14.92	14.5	14.46	14.51	14.52	14.59	14.51	14.51	14.55
487	14.84	14.91	14.49	14.45	14.5	14.51	14.58	14.5	14.5	14.54
488	14.83	14.9	14.48	14.44	14.49	14.5	14.58	14.49	14.49	14.54
489	14.82	14.89	14.47	14.43	14.48	14.49	14.57	14.48	14.48	14.53
490	14.81	14.88	14.46	14.43	14.47	14.48	14.56	14.47	14.47	14.52
491	14.8	14.87	14.45	14.42	14.46	14.47	14.55	14.46	14.44	14.51
492	14.79	14.86	14.45	14.41	14.45	14.46	14.54	14.45	14.42	14.5
493	14.78	14.85	14.44	14.4	14.44	14.45	14.53	14.44	14.41	14.5
494	14.77	14.84	14.43	14.39	14.44	14.44	14.52	14.44	14.4	14.49
495	14.76	14.83	14.42	14.39	14.43	14.44	14.51	14.43	14.38	14.48
496	14.74	14.82	14.42	14.38	14.42	14.43	14.5	14.42	14.36	14.47
497	14.73	14.81	14.41	14.37	14.42	14.42	14.49	14.41	14.35	14.46
498	14.72	14.8	14.4	14.37	14.41	14.41	14.48	14.4	14.35	14.45
499	14.71	14.8	14.39	14.36	14.4	14.4	14.47	14.4	14.34	14.44
500	14.7	14.79	14.39	14.36	14.39	14.39	14.46	14.39	14.33	14.43
501	14.69	14.78	14.38	14.35	14.38	14.38	14.46	14.38	14.31	14.42
502	14.69	14.77	14.37	14.34	14.37	14.38	14.45	14.37	14.3	14.42
503	14.68	14.76	14.36	14.34	14.37	14.37	14.44	14.37	14.29	14.41
504	14.67	14.75	14.35	14.33	14.36	14.36	14.43	14.36	14.29	14.4
505	14.66	14.74	14.35	14.32	14.35	14.35	14.42	14.35	14.28	14.39
506	14.65	14.73	14.34	14.31	14.34	14.35	14.41	14.34	14.27	14.38
507	14.64	14.72	14.33	14.31	14.33	14.34	14.4	14.33	14.26	14.37
508	14.63	14.71	14.32	14.3	14.33	14.33	14.39	14.32	14.25	14.37
509	14.62	14.7	14.32	14.29	14.32	14.32	14.38	14.32	14.25	14.36
510	14.62	14.69	14.31	14.28	14.31	14.31	14.37	14.31	14.24	14.35
511	14.61	14.68	14.3	14.27	14.3	14.3	14.37	14.3	14.23	14.34
512	14.6	14.67	14.29	14.26	14.3	14.3	14.36	14.29	14.22	14.33
513	14.59	14.66	14.28	14.25	14.29	14.29	14.35	14.28	14.21	14.32
514	14.58	14.65	14.27	14.24	14.28	14.28	14.35	14.28	14.2	14.32
515	14.57	14.64	14.27	14.24	14.27	14.27	14.34	14.27	14.2	14.31
516	14.56	14.64	14.26	14.23	14.26	14.26	14.33	14.26	14.19	14.3
517	14.55	14.63	14.25	14.22	14.25	14.25	14.32	14.25	14.18	14.29
518	14.54	14.62	14.24	14.21	14.25	14.25	14.31	14.24	14.17	14.29
519	14.53	14.61	14.23	14.21	14.24	14.24	14.3	14.24	14.17	14.28
520	14.53	14.6	14.22	14.2	14.23	14.23	14.29	14.23	14.16	14.27
521	14.52	14.59	14.22	14.19	14.22	14.22	14.29	14.22	14.15	14.26
522	14.51	14.58	14.21	14.18	14.22	14.22	14.28	14.21	14.14	14.25
523	14.5	14.57	14.2	14.17	14.21	14.21	14.27	14.2	14.13	14.24
524	14.49	14.56	14.19	14.16	14.2	14.2	14.26	14.19	14.13	14.23
525	14.49	14.55	14.19	14.15	14.2	14.2	14.26	14.19	14.12	14.23
526	14.48	14.54	14.18	14.14	14.19	14.19	14.25	14.18	14.11	14.22
527	14.47	14.53	14.17	14.14	14.18	14.18	14.24	14.17	14.1	14.21
528	14.46	14.53	14.16	14.13	14.17	14.17	14.23	14.16	14.1	14.2
529	14.45	14.52	14.16	14.12	14.17	14.17	14.22	14.16	14.09	14.2
530	14.44	14.51	14.15	14.12	14.16	14.16	14.21	14.15	14.08	14.19
531	14.43	14.5	14.14	14.11	14.15	14.15	14.2	14.14	14.08	14.18
532	14.42	14.49	14.13	14.1	14.14	14.15	14.2	14.14	14.07	14.17
533	14.41	14.48	14.12	14.09	14.13	14.14	14.19	14.13	14.06	14.17
534	14.4	14.48	14.12	14.09	14.12	14.13	14.18	14.12	14.06	14.16
535	14.39	14.47	14.11	14.08	14.11	14.12	14.18	14.11	14.05	14.15
536	14.38	14.46	14.1	14.07	14.1	14.12	14.17	14.11	14.04	14.14
537	14.37	14.45	14.09	14.06	14.1	14.11	14.16	14.1	14.03	14.13
538	14.36	14.44	14.08	14.06	14.09	14.1	14.15	14.09	14.03	14.13
539	14.36	14.43	14.07	14.05	14.08	14.09	14.15	14.09	14.02	14.12
540	14.35	14.42	14.07	14.04	14.08	14.09	14.14	14.08	14.01	14.11
541	14.34	14.41	14.06	14.04	14.07	14.08	14.13	14.07	14	14.11
542	14.33	14.41	14.05	14.03	14.06	14.07	14.12	14.06	14	14.1
543	14.32	14.4	14.04	14.02	14.05	14.06	14.11	14.06	13.99	14.09
544	14.31	14.39	14.03	14.01	14.05	14.05	14.1	14.05	13.98	14.08
545	14.3	14.38	14.03	14	14.04	14.04	14.1	14.04	13.97	14.08
546	14.3	14.37	14.02	14	14.03	14.04	14.09	14.03	13.96	14.07
547	14.29	14.36	14.01	13.99	14.02	14.03	14.08	14.03	13.96	14.06
548	14.28	14.35	14.01	13.98	14.01	14.02	14.07	14.02	13.95	14.05
549	14.27	14.34	14	13.98	14.01	14.02	14.07	14.01	13.94	14.04
550	14.26	14.33	13.99	13.97	14	14.01	14.06	14.01	13.93	14.03
551	14.25	14.32	13.99	13.97	13.99	14	14.05	14	13.92	14.03
552	14.24	14.32	13.98	13.96	13.99	13.99	14.04	13.99	13.91	14.02
553	14.23	14.31	13.97	13.95	13.98	13.99	14.03	13.98	13.91	14.01
554	14.22	14.3	13.97	13.94	13.97	13.98	14.02	13.98	13.9	14
555	14.22	14.29	13.96	13.94	13.96	13.97	14.02	13.97	13.89	13.99
556	14.21	14.28	13.95	13.93	13.96	13.96	14.01	13.96	13.88	13.98
557	14.2	14.27	13.94	13.92	13.95	13.95	14	13.96	13.87	13.98
558	14.19	14.26	13.93	13.92	13.94	13.95	13.99	13.95	13.87	13.97
559	14.19	14.26	13.92	13.91	13.93	13.94	13.99	13.94	13.86	13.96
560	14.18	14.25	13.91	13.9	13.93	13.93	13.98	13.93	13.85	13.95
561	14.17	14.24	13.9	13.89	13.92	13.92	13.97	13.93	13.85	13.95
562	14.16	14.23	13.9	13.88	13.91	13.91	13.96	13.92	13.84	13.94
563	14.15	14.22	13.89	13.87	13.9	13.9	13.95	13.91	13.83	13.93
564	14.14	14.21	13.88	13.86	13.89	13.89	13.94	13.9	13.83	13.92
565	14.14	14.2	13.88	13.86	13.89	13.89	13.93	13.9	13.82	13.91
566	14.13	14.19	13.87	13.85	13.88	13.88	13.92	13.89	13.81	13.91
567	14.12	14.19	13.86	13.84	13.87	13.87	13.92	13.88	13.81	13.9
568	14.11	14.18	13.85	13.84	13.87	13.86	13.91	13.88	13.8	13.89
569	14.1	14.17	13.85	13.83	13.86	13.86	13.9	13.87	13.79	13.88
570	14.09	14.16	13.84	13.82	13.85	13.85	13.9	13.87	13.79	13.88
571	14.09	14.16	13.83	13.81	13.85	13.84	13.89	13.86	13.78	13.87
572	14.08	14.15	13.82	13.8	13.84	13.83	13.88	13.85	13.77	13.86
573	14.07	14.14	13.82	13.8	13.83	13.82	13.87	13.85	13.76	13.85
574	14.06	14.13	13.81	13.79	13.83	13.82	13.86	13.84	13.76	13.84
575	14.06	14.13	13.8	13.78	13.82	13.81	13.86	13.83	13.75	13.84
576	14.05	14.12	13.8	13.78	13.81	13.81	13.85	13.82	13.74	13.83
577	14.04	14.11	13.79	13.77	13.8	13.8	13.84	13.82	13.74	13.82
578	14.04	14.1	13.78	13.76	13.8	13.79	13.84	13.81	13.73	13.81
579	14.03	14.09	13.78	13.75	13.79	13.79	13.83	13.8	13.72	13.81
580	14.02	14.09	13.77	13.75	13.78	13.78	13.82	13.8	13.72	13.8
581	14.01	14.08	13.76	13.74	13.77	13.77	13.82	13.79	13.71	13.79
582	14.01	14.07	13.76	13.73	13.76	13.76	13.81	13.78	13.7	13.79
583	14	14.06	13.75	13.73	13.76	13.76	13.8	13.78	13.69	13.78
584	13.99	14.06	13.74	13.72	13.75	13.75	13.79	13.77	13.69	13.77
585	13.98	14.05	13.74	13.71	13.74	13.75	13.79	13.76	13.68	13.77
586	13.98	14.04	13.73	13.71	13.74	13.74	13.78	13.76	13.67	13.76
587	13.97	14.04	13.72	13.7	13.73	13.74	13.77	13.75	13.67	13.76
588	13.96	14.03	13.72	13.69	13.72	13.73	13.77	13.75	13.66	13.75
589	13.95	14.02	13.71	13.69	13.72	13.72	13.76	13.74	13.65	13.74
590	13.95	14.02	13.7	13.68	13.71	13.71	13.76	13.73	13.65	13.74
591	13.94	14.01	13.7	13.67	13.7	13.71	13.75	13.73	13.64	13.73
592	13.93	14	13.69	13.67	13.7	13.7	13.74	13.72	13.64	13.72
593	13.93	14	13.68	13.66	13.69	13.7	13.74	13.72	13.63	13.72
594	13.92	13.99	13.68	13.66	13.68	13.69	13.73	13.71	13.63	13.71
595	13.92	13.98	13.67	13.65	13.68	13.69	13.72	13.7	13.62	13.71
596	13.91	13.98	13.66	13.65	13.67	13.68	13.72	13.7	13.61	13.7
597	13.9	13.97	13.66	13.64	13.67	13.67	13.71	13.69	13.61	13.69
598	13.9	13.96	13.65	13.64	13.66	13.67	13.7	13.69	13.6	13.69
599	13.89	13.95	13.65	13.63	13.66	13.66	13.7	13.68	13.6	13.68
600	13.88	13.95	13.64	13.62	13.65	13.65	13.69	13.64	13.59	13.67
601	13.88	13.94	13.64	13.62	13.65	13.65	13.69	13.64	13.58	13.67
602	13.87	13.93	13.63	13.61	13.64	13.64	13.68	13.63	13.58	13.66
603	13.86	13.93	13.63	13.61	13.63	13.64	13.68	13.63	13.57	13.66
604	13.86	13.92	13.62	13.61	13.63	13.63	13.67	13.62	13.57	13.65
605	13.85	13.92	13.62	13.6	13.63	13.63	13.67	13.62	13.56	13.65
606	13.84	13.91	13.61	13.6	13.62	13.62	13.66	13.61	13.56	13.64
607	13.84	13.91	13.61	13.59	13.62	13.62	13.65	13.6	13.55	13.63
608	13.83	13.9	13.6	13.59	13.61	13.61	13.65	13.6	13.55	13.63
609	13.83	13.9	13.59	13.58	13.61	13.61	13.64	13.59	13.54	13.62
610	13.82	13.89	13.59	13.58	13.6	13.6	13.64	13.59	13.54	13.61
611	13.81	13.88	13.58	13.57	13.6	13.6	13.63	13.58	13.53	13.61
612	13.81	13.88	13.58	13.57	13.59	13.59	13.62	13.58	13.53	13.6
613	13.8	13.87	13.57	13.56	13.58	13.59	13.62	13.57	13.52	13.6
614	13.8	13.86	13.57	13.56	13.58	13.58	13.61	13.57	13.52	13.59
615	13.79	13.86	13.56	13.55	13.57	13.58	13.61	13.56	13.51	13.58
616	13.79	13.85	13.56	13.55	13.57	13.57	13.6	13.55	13.51	13.58
617	13.78	13.85	13.55	13.54	13.56	13.56	13.59	13.55	13.5	13.57
618	13.78	13.84	13.55	13.53	13.56	13.56	13.59	13.54	13.5	13.57
619	13.77	13.84	13.54	13.53	13.55	13.55	13.58	13.54	13.49	13.56
620	13.76	13.83	13.54	13.52	13.55	13.55	13.58	13.53	13.49	13.56
621	13.76	13.82	13.54	13.52	13.54	13.54	13.57	13.53	13.48	13.55
622	13.75	13.82	13.53	13.51	13.53	13.54	13.56	13.52	13.48	13.55
623	13.75	13.81	13.53	13.51	13.53	13.53	13.56	13.52	13.47	13.54
624	13.74	13.81	13.53	13.5	13.52	13.53	13.55	13.51	13.47	13.54
625	13.73	13.8	13.52	13.49	13.52	13.52	13.55	13.51	13.46	13.53
626	13.73	13.8	13.52	13.49	13.51	13.51	13.54	13.5	13.46	13.53
627	13.72	13.79	13.51	13.48	13.5	13.51	13.54	13.5	13.45	13.52
628	13.72	13.79	13.51	13.47	13.5	13.5	13.53	13.49	13.45	13.52
629	13.71	13.78	13.5	13.47	13.49	13.5	13.52	13.49	13.44	13.51
630	13.71	13.78	13.5	13.46	13.48	13.49	13.52	13.48	13.44	13.51
631	13.7	13.77	13.49	13.46	13.48	13.49	13.51	13.48	13.43	13.5
632	13.7	13.76	13.49	13.45	13.47	13.48	13.51	13.47	13.43	13.5
633	13.69	13.76	13.48	13.44	13.47	13.47	13.5	13.47	13.42	13.49
634	13.68	13.75	13.48	13.44	13.46	13.47	13.5	13.46	13.42	13.49
635	13.68	13.75	13.47	13.43	13.46	13.46	13.49	13.46	13.41	13.48
636	13.67	13.74	13.47	13.42	13.45	13.45	13.49	13.45	13.41	13.48
637	13.67	13.73	13.46	13.42	13.45	13.45	13.48	13.45	13.4	13.47
638	13.66	13.73	13.46	13.41	13.44	13.44	13.48	13.44	13.41	13.46
639	13.65	13.72	13.45	13.41	13.44	13.44	13.47	13.44	13.41	13.46
640	13.65	13.72	13.44	13.4	13.43	13.43	13.47	13.43	13.41	13.45
641	13.64	13.71	13.43	13.4	13.43	13.43	13.46	13.43	13.4	13.45
642	13.64	13.71	13.43	13.39	13.42	13.42	13.45	13.42	13.39	13.44
643	13.63	13.7	13.42	13.39	13.42	13.42	13.45	13.42	13.39	13.44
644	13.62	13.7	13.41	13.38	13.41	13.41	13.44	13.41	13.38	13.43
645	13.62	13.69	13.41	13.38	13.41	13.41	13.44	13.41	13.38	13.43
646	13.61	13.68	13.4	13.37	13.4	13.4	13.43	13.4	13.37	13.42
647	13.61	13.68	13.39	13.37	13.4	13.4	13.43	13.4	13.37	13.41
648	13.6	13.67	13.39	13.36	13.39	13.39	13.42	13.39	13.36	13.41
649	13.6	13.67	13.38	13.36	13.39	13.39	13.42	13.39	13.35	13.4
650	13.59	13.66	13.38	13.35	13.38	13.38	13.41	13.38	13.35	13.4
651	13.59	13.65	13.37	13.35	13.38	13.38	13.4	13.38	13.34	13.39
652	13.58	13.65	13.36	13.34	13.37	13.37	13.4	13.37	13.34	13.39
653	13.58	13.64	13.36	13.34	13.37	13.37	13.39	13.37	13.33	13.38
654	13.57	13.63	13.35	13.33	13.36	13.36	13.39	13.36	13.33	13.38
655	13.56	13.63	13.35	13.33	13.36	13.36	13.38	13.36	13.32	13.37
656	13.56	13.62	13.34	13.32	13.35	13.36	13.38	13.35	13.3	13.37
657	13.55	13.62	13.34	13.32	13.35	13.35	13.37	13.35	13.29	13.36
658	13.55	13.61	13.33	13.32	13.34	13.35	13.37	13.34	13.28	13.36
659	13.54	13.61	13.33	13.31	13.34	13.34	13.36	13.34	13.28	13.35
660	13.54	13.6	13.32	13.31	13.33	13.34	13.36	13.33	13.27	13.35
661	13.53	13.6	13.32	13.3	13.33	13.33	13.35	13.32	13.27	13.34
662	13.53	13.59	13.31	13.3	13.32	13.33	13.35	13.32	13.26	13.34
663	13.52	13.59	13.31	13.29	13.32	13.32	13.34	13.31	13.26	13.33
664	13.52	13.58	13.3	13.29	13.31	13.31	13.34	13.31	13.26	13.33
665	13.51	13.58	13.3	13.28	13.31	13.31	13.33	13.3	13.25	13.32
666	13.5	13.57	13.29	13.28	13.3	13.3	13.33	13.3	13.25	13.32
667	13.5	13.57	13.29	13.27	13.3	13.3	13.32	13.3	13.24	13.31
668	13.49	13.56	13.28	13.27	13.29	13.29	13.32	13.29	13.24	13.31
669	13.49	13.56	13.28	13.26	13.29	13.29	13.31	13.29	13.23	13.3
670	13.48	13.55	13.27	13.26	13.28	13.28	13.31	13.28	13.22	13.3
671	13.48	13.54	13.27	13.25	13.27	13.28	13.3	13.28	13.22	13.29
672	13.47	13.54	13.26	13.25	13.27	13.27	13.3	13.27	13.22	13.29
673	13.47	13.53	13.26	13.24	13.26	13.27	13.29	13.27	13.21	13.28
674	13.47	13.53	13.26	13.24	13.26	13.26	13.29	13.26	13.21	13.28
675	13.46	13.52	13.25	13.24	13.25	13.26	13.28	13.26	13.2	13.27
676	13.45	13.52	13.25	13.23	13.25	13.25	13.28	13.25	13.2	13.27
677	13.45	13.51	13.24	13.23	13.24	13.25	13.27	13.25	13.19	13.26
678	13.44	13.51	13.24	13.22	13.24	13.24	13.27	13.24	13.19	13.26
679	13.44	13.5	13.23	13.22	13.23	13.24	13.26	13.24	13.19	13.25
680	13.43	13.5	13.23	13.21	13.23	13.23	13.26	13.24	13.18	13.25
681	13.43	13.49	13.22	13.21	13.23	13.23	13.25	13.23	13.18	13.24
682	13.42	13.49	13.22	13.2	13.22	13.23	13.25	13.23	13.17	13.24
683	13.42	13.48	13.21	13.2	13.22	13.22	13.24	13.22	13.17	13.23
684	13.41	13.48	13.21	13.19	13.21	13.22	13.24	13.22	13.16	13.23
685	13.41	13.47	13.21	13.19	13.21	13.21	13.23	13.21	13.16	13.22
686	13.4	13.46	13.2	13.18	13.21	13.21	13.23	13.21	13.16	13.22
687	13.4	13.46	13.2	13.18	13.2	13.2	13.22	13.21	13.15	13.21
688	13.39	13.45	13.19	13.17	13.2	13.2	13.22	13.2	13.15	13.21
689	13.39	13.45	13.19	13.17	13.2	13.19	13.22	13.2	13.14	13.2
690	13.39	13.44	13.19	13.16	13.19	13.19	13.21	13.19	13.14	13.2
691	13.38	13.44	13.18	13.16	13.19	13.19	13.21	13.19	13.14	13.2
692	13.38	13.44	13.18	13.16	13.18	13.18	13.2	13.19	13.13	13.19
693	13.37	13.43	13.18	13.16	13.18	13.18	13.2	13.18	13.13	13.19
694	13.37	13.43	13.17	13.15	13.18	13.18	13.19	13.18	13.12	13.19
695	13.36	13.42	13.17	13.15	13.17	13.17	13.19	13.18	13.12	13.18
696	13.36	13.42	13.17	13.14	13.17	13.17	13.18	13.17	13.11	13.18
697	13.36	13.42	13.16	13.14	13.16	13.17	13.18	13.17	13.11	13.17
698	13.35	13.41	13.16	13.13	13.16	13.16	13.18	13.17	13.11	13.17
699	13.35	13.41	13.15	13.13	13.16	13.16	13.17	13.16	13.1	13.17
700	13.34	13.4	13.15	13.13	13.15	13.15	13.17	13.16	13.1	13.16
701	13.34	13.4	13.15	13.13	13.15	13.15	13.17	13.16	13.1	13.16
702	13.33	13.39	13.14	13.12	13.15	13.15	13.16	13.15	13.09	13.16
703	13.33	13.39	13.14	13.12	13.14	13.14	13.16	13.15	13.09	13.15
704	13.32	13.39	13.13	13.12	13.14	13.14	13.15	13.15	13.09	13.15
705	13.32	13.38	13.13	13.11	13.14	13.13	13.15	13.15	13.08	13.15
706	13.31	13.38	13.13	13.11	13.13	13.13	13.14	13.14	13.08	13.14
707	13.31	13.37	13.12	13.11	13.13	13.13	13.14	13.14	13.08	13.14
708	13.31	13.37	13.12	13.1	13.12	13.12	13.14	13.14	13.07	13.13
709	13.3	13.36	13.12	13.1	13.12	13.12	13.13	13.13	13.07	13.13
710	13.3	13.36	13.11	13.1	13.12	13.11	13.13	13.13	13.07	13.13
711	13.29	13.35	13.11	13.1	13.11	13.11	13.13	13.1	13.06	13.12
712	13.29	13.35	13.11	13.09	13.11	13.11	13.12	13.1	13.06	13.12
713	13.28	13.35	13.1	13.09	13.1	13.1	13.12	13.1	13.06	13.12
714	13.28	13.34	13.1	13.09	13.1	13.1	13.11	13.09	13.05	13.11
715	13.28	13.34	13.09	13.08	13.1	13.09	13.11	13.09	13.05	13.11
716	13.27	13.34	13.09	13.08	13.09	13.09	13.11	13.08	13.05	13.1
717	13.27	13.33	13.09	13.07	13.09	13.08	13.1	13.08	13.04	13.1
718	13.26	13.33	13.08	13.07	13.08	13.08	13.1	13.08	13.04	13.1
719	13.26	13.32	13.08	13.07	13.08	13.08	13.09	13.07	13.03	13.1
720	13.26	13.32	13.07	13.06	13.08	13.07	13.09	13.07	13.03	13.09
721	13.25	13.31	13.07	13.06	13.07	13.07	13.09	13.06	13.03	13.09
722	13.25	13.31	13.07	13.06	13.07	13.07	13.08	13.06	13.02	13.08
723	13.25	13.31	13.06	13.05	13.07	13.06	13.08	13.06	13.02	13.08
724	13.24	13.3	13.06	13.05	13.06	13.06	13.08	13.05	13.02	13.08
725	13.24	13.3	13.05	13.04	13.06	13.06	13.07	13.05	13.01	13.07
726	13.24	13.29	13.05	13.04	13.05	13.05	13.07	13.04	13.01	13.07
727	13.23	13.29	13.05	13.03	13.05	13.05	13.07	13.04	13	13.06
728	13.23	13.29	13.04	13.03	13.05	13.05	13.06	13.04	13	13.06
729	13.22	13.28	13.04	13.03	13.04	13.04	13.06	13.03	13	13.06
730	13.22	13.28	13.04	13.02	13.04	13.04	13.05	13.03	12.99	13.05
731	13.22	13.28	13.03	13.02	13.03	13.04	13.05	13.03	12.99	13.05
732	13.21	13.27	13.03	13.02	13.03	13.03	13.05	13.02	12.98	13.04
733	13.21	13.27	13.03	13.01	13.03	13.03	13.04	13.02	12.98	13.04
734	13.2	13.27	13.02	13.01	13.02	13.02	13.04	13.01	12.98	13.03
735	13.2	13.26	13.02	13	13.02	13.02	13.03	13.01	12.97	13.02
736	13.2	13.26	13.01	13	13.01	13.01	13.03	13.01	12.97	13.02
737	13.19	13.25	13.01	12.99	13.01	13.01	13.03	13	12.97	13.02
738	13.19	13.25	13	12.99	13.01	13	13.02	13	12.96	13.01
739	13.18	13.25	13	12.99	13	13	13.02	13	12.96	13.01
740	13.18	13.24	13	12.98	13	13	13.02	12.99	12.95	13
741	13.18	13.24	12.99	12.98	12.99	12.99	13.01	12.99	12.95	13
742	13.17	13.23	12.99	12.97	12.99	12.99	13.01	12.99	12.95	13
743	13.17	13.23	12.98	12.97	12.99	12.99	13.01	12.98	12.94	12.99
744	13.17	13.23	12.98	12.97	12.98	12.98	13.01	12.98	12.94	12.99
745	13.16	13.22	12.97	12.96	12.98	12.98	13.01	12.97	12.94	12.98
746	13.16	13.22	12.97	12.96	12.98	12.97	13.01	12.97	12.93	12.98
747	13.16	13.22	12.97	12.95	12.97	12.97	13	12.97	12.93	12.98
748	13.15	13.21	12.96	12.95	12.97	12.96	13	12.96	12.92	12.97
749	13.15	13.21	12.96	12.95	12.96	12.96	12.99	12.96	12.92	12.97
750	13.14	13.2	12.96	12.94	12.96	12.96	12.99	12.96	12.92	12.97
751	13.14	13.2	12.95	12.94	12.96	12.95	12.99	12.95	12.91	12.96
752	13.14	13.2	12.95	12.93	12.95	12.95	12.98	12.95	12.91	12.96
753	13.13	13.19	12.94	12.93	12.95	12.95	12.98	12.95	12.9	12.95
754	13.13	13.19	12.94	12.93	12.94	12.94	12.97	12.94	12.9	12.95
755	13.12	13.19	12.94	12.92	12.94	12.94	12.97	12.94	12.9	12.94
756	13.12	13.18	12.93	12.92	12.94	12.93	12.97	12.93	12.89	12.94
757	13.12	13.18	12.93	12.91	12.93	12.93	12.96	12.93	12.89	12.94
758	13.11	13.18	12.93	12.91	12.93	12.93	12.96	12.93	12.89	12.93
759	13.11	13.17	12.92	12.91	12.93	12.92	12.95	12.92	12.88	12.93
760	13.11	13.17	12.92	12.9	12.92	12.92	12.95	12.92	12.88	12.92
761	13.1	13.17	12.91	12.9	12.92	12.92	12.95	12.92	12.88	12.92
762	13.1	13.16	12.91	12.9	12.91	12.91	12.94	12.91	12.87	12.92
763	13.1	13.16	12.9	12.89	12.91	12.91	12.94	12.91	12.87	12.91
764	13.09	13.15	12.9	12.89	12.91	12.9	12.93	12.91	12.86	12.91
765	13.09	13.15	12.9	12.88	12.9	12.9	12.92	12.9	12.86	12.9
766	13.09	13.15	12.89	12.88	12.9	12.9	12.91	12.9	12.86	12.9
767	13.08	13.14	12.89	12.87	12.89	12.89	12.91	12.89	12.86	12.9
768	13.08	13.14	12.89	12.87	12.89	12.89	12.9	12.89	12.85	12.89
769	13.07	13.13	12.89	12.87	12.89	12.89	12.9	12.89	12.85	12.89
770	13.07	13.13	12.88	12.86	12.88	12.88	12.89	12.88	12.85	12.89
771	13.07	13.13	12.88	12.86	12.88	12.88	12.89	12.88	12.84	12.89
772	13.06	13.12	12.88	12.86	12.87	12.88	12.89	12.88	12.84	12.88
773	13.06	13.12	12.87	12.85	12.87	12.87	12.89	12.87	12.84	12.88
774	13.06	13.12	12.87	12.85	12.87	12.87	12.88	12.87	12.83	12.88
775	13.05	13.12	12.86	12.85	12.86	12.86	12.88	12.87	12.83	12.87
776	13.05	13.11	12.86	12.84	12.86	12.86	12.88	12.86	12.83	12.87
777	13.05	13.11	12.86	12.84	12.86	12.86	12.87	12.86	12.83	12.87
778	13.04	13.11	12.85	12.84	12.86	12.86	12.87	12.86	12.82	12.87
779	13.04	13.1	12.85	12.83	12.85	12.85	12.87	12.85	12.82	12.86
780	13.04	13.1	12.85	12.83	12.85	12.85	12.86	12.85	12.81	12.86
781	13.04	13.1	12.84	12.83	12.85	12.85	12.86	12.85	12.81	12.86
782	13.03	13.09	12.84	12.82	12.85	12.84	12.86	12.85	12.81	12.86
783	13.03	13.09	12.84	12.82	12.84	12.84	12.85	12.84	12.8	12.85
784	13.03	13.09	12.84	12.82	12.84	12.84	12.85	12.84	12.8	12.85
785	13.02	13.08	12.83	12.81	12.84	12.84	12.85	12.84	12.8	12.84
786	13.02	13.08	12.83	12.81	12.84	12.83	12.84	12.83	12.79	12.84
787	13.01	13.07	12.83	12.81	12.83	12.83	12.84	12.83	12.79	12.84
788	13.01	13.07	12.83	12.81	12.83	12.83	12.84	12.83	12.79	12.84
789	13.01	13.07	12.82	12.8	12.83	12.83	12.83	12.83	12.78	12.83
790	13	13.06	12.82	12.8	12.82	12.83	12.83	12.82	12.78	12.83
791	13	13.06	12.82	12.8	12.82	12.82	12.83	12.82	12.78	12.82
792	13	13.06	12.82	12.79	12.82	12.82	12.82	12.82	12.78	12.82
793	12.99	13.05	12.81	12.79	12.81	12.82	12.82	12.82	12.77	12.82
794	12.99	13.05	12.81	12.79	12.81	12.81	12.82	12.81	12.77	12.82
795	12.99	13.05	12.81	12.79	12.81	12.81	12.82	12.81	12.77	12.81
796	12.98	13.04	12.8	12.78	12.8	12.81	12.81	12.81	12.76	12.81
797	12.98	13.04	12.8	12.78	12.8	12.81	12.81	12.81	12.76	12.81
798	12.98	13.04	12.8	12.78	12.8	12.8	12.81	12.8	12.76	12.8
799	12.97	13.03	12.8	12.78	12.8	12.8	12.8	12.8	12.76	12.8
800	12.97	13.03	12.79	12.77	12.79	12.8	12.8	12.8	12.76	12.8
801	12.97	13.03	12.79	12.77	12.79	12.79	12.8	12.8	12.76	12.79
802	12.97	13.02	12.79	12.77	12.79	12.79	12.79	12.79	12.77	12.79
803	12.96	13.02	12.79	12.77	12.78	12.79	12.79	12.79	12.76	12.79
804	12.96	13.02	12.78	12.76	12.78	12.78	12.79	12.79	12.76	12.79
805	12.96	13.01	12.78	12.76	12.78	12.78	12.79	12.79	12.76	12.79
806	12.95	13.01	12.78	12.76	12.78	12.78	12.78	12.78	12.76	12.78
807	12.95	13.01	12.78	12.75	12.77	12.78	12.78	12.78	12.76	12.78
808	12.95	13	12.77	12.75	12.77	12.77	12.78	12.78	12.75	12.78
809	12.94	13	12.77	12.75	12.77	12.77	12.78	12.78	12.75	12.78
810	12.94	13	12.77	12.74	12.76	12.77	12.77	12.77	12.75	12.77
811	12.94	13	12.77	12.74	12.76	12.77	12.77	12.77	12.74	12.77
812	12.93	12.99	12.76	12.74	12.76	12.76	12.77	12.77	12.74	12.77
813	12.93	12.99	12.76	12.73	12.76	12.76	12.77	12.77	12.74	12.77
814	12.93	12.99	12.76	12.73	12.75	12.76	12.76	12.76	12.74	12.76
815	12.93	12.98	12.75	12.73	12.75	12.76	12.76	12.76	12.73	12.76
816	12.92	12.98	12.75	12.73	12.75	12.75	12.76	12.76	12.73	12.76
817	12.92	12.98	12.75	12.73	12.75	12.75	12.76	12.76	12.73	12.76
818	12.92	12.97	12.75	12.72	12.75	12.75	12.75	12.75	12.72	12.76
819	12.91	12.97	12.74	12.72	12.74	12.75	12.75	12.75	12.71	12.75
820	12.91	12.97	12.74	12.72	12.74	12.74	12.75	12.75	12.7	12.75
821	12.91	12.96	12.74	12.72	12.74	12.74	12.75	12.75	12.7	12.75
822	12.91	12.96	12.74	12.71	12.74	12.74	12.74	12.74	12.7	12.75
823	12.9	12.96	12.73	12.71	12.74	12.73	12.74	12.74	12.69	12.74
824	12.9	12.95	12.73	12.71	12.73	12.73	12.74	12.74	12.69	12.74
825	12.9	12.95	12.73	12.71	12.73	12.73	12.74	12.74	12.69	12.74
826	12.9	12.95	12.73	12.7	12.73	12.73	12.73	12.73	12.69	12.74
827	12.89	12.95	12.72	12.7	12.73	12.72	12.73	12.73	12.68	12.73
828	12.89	12.94	12.72	12.7	12.72	12.72	12.73	12.73	12.68	12.73
829	12.89	12.94	12.72	12.7	12.72	12.72	12.73	12.73	12.68	12.73
830	12.88	12.94	12.72	12.69	12.72	12.71	12.72	12.72	12.68	12.72
831	12.88	12.94	12.71	12.69	12.72	12.71	12.72	12.72	12.68	12.72
832	12.88	12.93	12.71	12.69	12.71	12.71	12.72	12.72	12.67	12.72
833	12.88	12.93	12.71	12.69	12.71	12.71	12.72	12.72	12.67	12.72
834	12.88	12.93	12.71	12.68	12.71	12.71	12.71	12.71	12.67	12.71
835	12.87	12.93	12.71	12.68	12.71	12.71	12.71	12.71	12.67	12.71
836	12.87	12.92	12.7	12.68	12.7	12.7	12.71	12.71	12.66	12.71
837	12.87	12.92	12.7	12.68	12.7	12.7	12.71	12.71	12.66	12.7
838	12.87	12.92	12.7	12.67	12.7	12.7	12.71	12.71	12.66	12.7
839	12.86	12.91	12.7	12.67	12.7	12.7	12.7	12.7	12.66	12.7
840	12.86	12.91	12.7	12.67	12.69	12.69	12.7	12.7	12.66	12.7
841	12.86	12.91	12.69	12.67	12.69	12.69	12.7	12.7	12.65	12.69
842	12.86	12.91	12.69	12.67	12.69	12.69	12.7	12.7	12.65	12.69
843	12.85	12.9	12.69	12.67	12.69	12.69	12.7	12.7	12.65	12.69
844	12.85	12.9	12.69	12.66	12.69	12.69	12.69	12.69	12.65	12.69
845	12.85	12.9	12.68	12.66	12.68	12.68	12.69	12.69	12.65	12.69
846	12.85	12.9	12.68	12.66	12.68	12.68	12.69	12.69	12.65	12.68
847	12.84	12.9	12.68	12.65	12.68	12.68	12.69	12.69	12.64	12.68
848	12.84	12.9	12.68	12.65	12.68	12.68	12.68	12.68	12.64	12.68
849	12.84	12.89	12.67	12.65	12.68	12.68	12.68	12.68	12.64	12.68
850	12.84	12.89	12.67	12.65	12.67	12.67	12.68	12.68	12.64	12.68
851	12.83	12.89	12.67	12.65	12.67	12.67	12.68	12.68	12.63	12.68
852	12.83	12.89	12.66	12.64	12.67	12.67	12.67	12.67	12.63	12.67
853	12.83	12.88	12.66	12.64	12.66	12.67	12.67	12.67	12.63	12.67
854	12.83	12.88	12.66	12.64	12.66	12.66	12.67	12.67	12.63	12.67
855	12.82	12.88	12.65	12.64	12.66	12.66	12.67	12.67	12.62	12.67
856	12.82	12.88	12.65	12.63	12.65	12.66	12.66	12.66	12.62	12.66
857	12.82	12.87	12.65	12.63	12.65	12.65	12.66	12.66	12.62	12.66
858	12.82	12.87	12.65	12.63	12.65	12.65	12.66	12.66	12.61	12.66
859	12.81	12.87	12.64	12.63	12.65	12.65	12.66	12.66	12.61	12.66
860	12.81	12.87	12.64	12.62	12.64	12.64	12.65	12.65	12.61	12.66
861	12.81	12.86	12.64	12.62	12.64	12.64	12.65	12.65	12.61	12.65
862	12.8	12.86	12.63	12.62	12.64	12.64	12.65	12.65	12.6	12.65
863	12.8	12.86	12.63	12.61	12.63	12.63	12.64	12.64	12.6	12.65
864	12.8	12.86	12.63	12.61	12.63	12.63	12.64	12.64	12.6	12.64
865	12.8	12.86	12.62	12.61	12.63	12.63	12.64	12.64	12.59	12.64
866	12.79	12.85	12.62	12.6	12.62	12.62	12.63	12.63	12.59	12.64
867	12.79	12.85	12.62	12.6	12.62	12.62	12.63	12.63	12.59	12.63
868	12.79	12.85	12.62	12.6	12.62	12.62	12.63	12.63	12.58	12.63
869	12.79	12.85	12.61	12.6	12.61	12.61	12.62	12.62	12.58	12.62
870	12.78	12.84	12.61	12.59	12.61	12.61	12.62	12.62	12.58	12.62
871	12.78	12.84	12.61	12.59	12.61	12.61	12.62	12.62	12.57	12.62
872	12.78	12.84	12.6	12.59	12.6	12.61	12.61	12.61	12.57	12.61
873	12.78	12.83	12.6	12.58	12.6	12.6	12.61	12.61	12.57	12.61
874	12.77	12.83	12.6	12.58	12.6	12.6	12.61	12.61	12.56	12.6
875	12.77	12.83	12.6	12.58	12.59	12.6	12.6	12.6	12.56	12.6
876	12.77	12.83	12.59	12.58	12.59	12.59	12.6	12.6	12.56	12.6
877	12.77	12.82	12.59	12.57	12.59	12.59	12.6	12.6	12.56	12.59
878	12.77	12.82	12.59	12.57	12.58	12.59	12.59	12.59	12.55	12.59
879	12.76	12.82	12.59	12.57	12.58	12.59	12.59	12.59	12.55	12.59
880	12.76	12.82	12.58	12.57	12.58	12.58	12.59	12.59	12.55	12.58
881	12.76	12.81	12.58	12.57	12.58	12.58	12.58	12.58	12.55	12.58
882	12.76	12.81	12.58	12.57	12.57	12.58	12.58	12.58	12.54	12.58
883	12.75	12.81	12.57	12.56	12.57	12.57	12.58	12.58	12.54	12.57
884	12.75	12.81	12.57	12.56	12.57	12.57	12.58	12.58	12.54	12.57
885	12.75	12.8	12.57	12.56	12.57	12.57	12.57	12.57	12.54	12.57
886	12.75	12.8	12.57	12.56	12.56	12.57	12.57	12.57	12.53	12.57
887	12.74	12.8	12.56	12.56	12.56	12.56	12.57	12.57	12.53	12.56
888	12.74	12.8	12.56	12.55	12.56	12.56	12.57	12.57	12.53	12.56
889	12.74	12.79	12.56	12.55	12.56	12.56	12.57	12.57	12.53	12.56
890	12.74	12.79	12.56	12.55	12.56	12.56	12.56	12.56	12.52	12.56
891	12.74	12.79	12.55	12.55	12.55	12.56	12.56	12.56	12.52	12.56
892	12.73	12.78	12.55	12.54	12.55	12.55	12.56	12.56	12.52	12.56
893	12.73	12.78	12.55	12.54	12.55	12.55	12.56	12.56	12.52	12.55
894	12.73	12.78	12.55	12.54	12.55	12.55	12.56	12.56	12.52	12.55
895	12.73	12.78	12.55	12.54	12.55	12.55	12.55	12.55	12.51	12.55
896	12.72	12.77	12.55	12.53	12.55	12.54	12.55	12.55	12.51	12.55
897	12.72	12.77	12.55	12.53	12.55	12.54	12.55	12.55	12.51	12.55
898	12.72	12.77	12.54	12.53	12.54	12.54	12.55	12.55	12.51	12.54
899	12.72	12.77	12.54	12.53	12.54	12.54	12.55	12.55	12.51	12.54
900	12.71	12.76	12.54	12.53	12.54	12.54	12.54	12.54	12.51	12.54
901	12.71	12.76	12.54	12.52	12.54	12.53	12.54	12.54	12.51	12.54
902	12.71	12.76	12.54	12.52	12.54	12.53	12.54	12.54	12.51	12.54
903	12.71	12.76	12.54	12.52	12.54	12.53	12.54	12.54	12.5	12.54
904	12.7	12.76	12.53	12.52	12.53	12.53	12.54	12.54	12.5	12.54
905	12.7	12.75	12.53	12.51	12.53	12.53	12.53	12.53	12.5	12.54
906	12.7	12.75	12.53	12.51	12.53	12.53	12.53	12.53	12.5	12.54
907	12.7	12.75	12.53	12.51	12.53	12.52	12.53	12.53	12.5	12.53
908	12.7	12.75	12.53	12.51	12.53	12.52	12.53	12.53	12.5	12.53
909	12.69	12.74	12.53	12.5	12.52	12.52	12.52	12.52	12.5	12.53
910	12.69	12.74	12.52	12.5	12.52	12.52	12.52	12.52	12.49	12.53
911	12.69	12.74	12.52	12.5	12.52	12.52	12.52	12.52	12.49	12.53
912	12.69	12.74	12.52	12.5	12.52	12.51	12.52	12.52	12.49	12.53
913	12.68	12.73	12.52	12.5	12.52	12.51	12.52	12.52	12.49	12.53
914	12.68	12.73	12.52	12.49	12.51	12.51	12.52	12.52	12.49	12.53
915	12.68	12.73	12.51	12.49	12.51	12.51	12.51	12.51	12.49	12.52
916	12.68	12.73	12.51	12.49	12.51	12.51	12.51	12.51	12.48	12.52
917	12.67	12.73	12.51	12.49	12.51	12.51	12.51	12.51	12.48	12.52
918	12.67	12.72	12.51	12.49	12.5	12.51	12.51	12.51	12.48	12.52
919	12.67	12.72	12.51	12.48	12.5	12.5	12.51	12.51	12.48	12.51
920	12.67	12.72	12.5	12.48	12.5	12.5	12.5	12.5	12.48	12.51
921	12.67	12.72	12.5	12.48	12.5	12.5	12.5	12.5	12.47	12.51
922	12.66	12.72	12.5	12.48	12.49	12.5	12.5	12.5	12.47	12.5
923	12.66	12.71	12.5	12.47	12.49	12.5	12.5	12.5	12.47	12.5
924	12.66	12.71	12.49	12.47	12.49	12.49	12.49	12.49	12.47	12.5
925	12.66	12.71	12.49	12.47	12.49	12.49	12.49	12.49	12.47	12.5
926	12.66	12.71	12.49	12.47	12.48	12.49	12.49	12.49	12.46	12.49
927	12.65	12.71	12.49	12.46	12.48	12.49	12.49	12.49	12.46	12.49
928	12.65	12.7	12.49	12.46	12.48	12.49	12.49	12.49	12.46	12.49
929	12.65	12.7	12.48	12.46	12.48	12.49	12.48	12.48	12.46	12.48
930	12.65	12.7	12.48	12.46	12.48	12.48	12.48	12.48	12.46	12.48
931	12.65	12.7	12.48	12.46	12.48	12.48	12.48	12.48	12.45	12.48
932	12.65	12.69	12.48	12.46	12.47	12.48	12.48	12.48	12.45	12.47
933	12.64	12.69	12.48	12.45	12.47	12.48	12.48	12.48	12.45	12.47
934	12.64	12.69	12.48	12.45	12.47	12.48	12.48	12.48	12.45	12.47
935	12.64	12.69	12.47	12.45	12.47	12.48	12.47	12.47	12.45	12.47
936	12.64	12.69	12.47	12.45	12.47	12.47	12.47	12.47	12.44	12.46
937	12.64	12.69	12.47	12.45	12.47	12.47	12.47	12.47	12.44	12.46
938	12.63	12.68	12.47	12.45	12.47	12.47	12.47	12.47	12.44	12.46
939	12.63	12.68	12.47	12.44	12.46	12.47	12.47	12.47	12.44	12.46
940	12.63	12.68	12.47	12.44	12.46	12.47	12.47	12.47	12.43	12.46
941	12.63	12.68	12.46	12.44	12.46	12.47	12.46	12.46	12.43	12.46
942	12.63	12.68	12.46	12.44	12.46	12.46	12.46	12.46	12.43	12.46
943	12.62	12.67	12.46	12.44	12.46	12.46	12.46	12.46	12.43	12.46
944	12.62	12.67	12.46	12.44	12.46	12.46	12.46	12.46	12.43	12.45
945	12.62	12.67	12.46	12.44	12.46	12.46	12.46	12.46	12.43	12.45
946	12.62	12.67	12.46	12.43	12.45	12.46	12.45	12.45	12.42	12.45
947	12.62	12.67	12.45	12.43	12.45	12.46	12.45	12.45	12.42	12.45
948	12.62	12.67	12.45	12.43	12.45	12.45	12.45	12.45	12.42	12.45
949	12.61	12.67	12.45	12.43	12.45	12.45	12.45	12.45	12.42	12.45
950	12.61	12.66	12.45	12.43	12.45	12.45	12.45	12.45	12.42	12.45
951	12.61	12.66	12.45	12.43	12.45	12.45	12.45	12.45	12.42	12.45
952	12.61	12.66	12.45	12.43	12.45	12.45	12.45	12.45	12.42	12.45
953	12.61	12.66	12.45	12.43	12.45	12.45	12.44	12.44	12.42	12.45
954	12.61	12.66	12.45	12.43	12.44	12.45	12.44	12.44	12.42	12.45
955	12.6	12.66	12.44	12.42	12.44	12.44	12.44	12.44	12.42	12.45
956	12.6	12.66	12.44	12.42	12.44	12.44	12.44	12.44	12.42	12.45
957	12.6	12.65	12.44	12.42	12.44	12.44	12.44	12.44	12.41	12.44
958	12.6	12.65	12.44	12.42	12.44	12.44	12.44	12.44	12.41	12.44
959	12.6	12.65	12.44	12.42	12.44	12.44	12.44	12.44	12.41	12.44
960	12.6	12.65	12.44	12.42	12.44	12.44	12.44	12.44	12.41	12.44
961	12.59	12.65	12.43	12.41	12.43	12.43	12.43	12.43	12.41	12.44
962	12.59	12.65	12.43	12.41	12.43	12.43	12.43	12.43	12.41	12.44
963	12.59	12.65	12.43	12.41	12.43	12.43	12.43	12.43	12.41	12.44
964	12.59	12.64	12.43	12.41	12.43	12.43	12.43	12.43	12.41	12.44
965	12.59	12.64	12.43	12.41	12.43	12.43	12.43	12.43	12.4	12.44
966	12.59	12.64	12.43	12.41	12.43	12.42	12.43	12.43	12.4	12.44
967	12.58	12.64	12.43	12.4	12.43	12.42	12.42	12.42	12.4	12.44
968	12.58	12.64	12.42	12.4	12.42	12.42	12.42	12.42	12.4	12.43
969	12.58	12.64	12.42	12.4	12.42	12.42	12.42	12.42	12.39	12.43
970	12.58	12.63	12.42	12.4	12.42	12.42	12.42	12.42	12.39	12.43
971	12.58	12.63	12.42	12.4	12.42	12.41	12.42	12.42	12.39	12.43
972	12.57	12.63	12.41	12.4	12.41	12.41	12.42	12.42	12.39	12.42
973	12.57	12.63	12.41	12.39	12.41	12.41	12.41	12.41	12.38	12.42
974	12.57	12.63	12.41	12.39	12.41	12.41	12.41	12.41	12.38	12.42
975	12.57	12.63	12.41	12.39	12.41	12.4	12.41	12.41	12.38	12.41
976	12.57	12.62	12.41	12.39	12.4	12.4	12.41	12.41	12.38	12.41
977	12.56	12.62	12.4	12.39	12.4	12.4	12.4	12.4	12.37	12.41
978	12.56	12.62	12.4	12.39	12.4	12.4	12.4	12.4	12.37	12.4
979	12.56	12.62	12.4	12.38	12.4	12.4	12.4	12.4	12.37	12.4
980	12.56	12.62	12.4	12.38	12.39	12.39	12.4	12.4	12.36	12.4
981	12.56	12.61	12.4	12.38	12.39	12.39	12.39	12.39	12.36	12.39
982	12.56	12.61	12.4	12.38	12.39	12.39	12.39	12.39	12.36	12.39
983	12.55	12.61	12.39	12.37	12.39	12.39	12.39	12.39	12.36	12.38
984	12.55	12.61	12.39	12.37	12.38	12.39	12.39	12.39	12.36	12.38
985	12.55	12.61	12.39	12.37	12.38	12.38	12.39	12.39	12.36	12.38
986	12.55	12.6	12.39	12.37	12.38	12.38	12.38	12.38	12.35	12.37
987	12.55	12.6	12.39	12.37	12.38	12.38	12.38	12.38	12.35	12.37
988	12.55	12.6	12.38	12.37	12.38	12.38	12.38	12.38	12.35	12.37
989	12.55	12.6	12.38	12.36	12.37	12.38	12.38	12.38	12.35	12.37
990	12.54	12.6	12.38	12.36	12.37	12.37	12.38	12.38	12.35	12.36
991	12.54	12.59	12.38	12.36	12.37	12.37	12.37	12.37	12.34	12.36
992	12.54	12.59	12.38	12.36	12.37	12.37	12.37	12.37	12.34	12.36
993	12.54	12.59	12.37	12.36	12.37	12.37	12.37	12.37	12.34	12.36
994	12.54	12.59	12.37	12.36	12.36	12.37	12.37	12.37	12.34	12.36
995	12.54	12.59	12.37	12.35	12.36	12.36	12.37	12.37	12.34	12.36
996	12.54	12.59	12.37	12.35	12.36	12.36	12.36	12.36	12.34	12.35
997	12.53	12.58	12.37	12.35	12.36	12.36	12.36	12.36	12.34	12.35
998	12.53	12.58	12.37	12.35	12.36	12.36	12.36	12.36	12.34	12.35
999	12.53	12.58	12.37	12.35	12.36	12.36	12.36	12.36	12.33	12.35
1000	12.53	12.58	12.37	12.35	12.36	12.36	12.36	12.36	12.33	12.35

## Sheet: Bed
Final bed elevations (cm)
X(m)	0.1	0.2	0.3	0.4	0.5	0.6	0.7	0.8	0.9	1	1.1	1.2	1.3	1.4	1.5	1.6	1.7	1.8	1.9	2	2.1	2.2	2.3	2.4	2.5	2.6	2.7	2.8	2.9	3	3.1	3.2	3.3	3.4	3.5	3.6	3.7	3.8	3.9	4	4.1	4.2	4.3	4.4	4.5	4.6	4.7	4.8	4.9
-0.6	0.16	0.42	0.87	2.02	1.89	1.74	1.25	0.53	-0.19	-0.45	-0.85	-1.02	-1.22	-1.16	-1.23	-1.11	-0.57	-0.46	-0.23	-0.2	-0.12	-0.1	-0.1	-0.1	-0.14	-0.13	-0.11	-0.12	-0.1	-0.1	-0.07	-0.1	-0.08	-0.09	-0.05	-0.06	-0.06	-0.07	-0.07	-0.08	-0.08	-0.09	-0.09	-0.08	-0.08	-0.07	-0.06	-0.06	-0.07
-0.55	0.55	0.32	1.84	2.89	3.2	2.47	2.79	2.2	1.65	1.29	0.52	-0.78	-1.53	-1.65	-1.8	-1.69	-1.45	-1.1	-0.77	-0.56	-0.4	-0.13	-0.16	-0.12	-0.07	-0.1	-0.12	-0.11	-0.13	-0.08	-0.07	-0.11	-0.09	-0.08	-0.05	-0.06	-0.07	-0.08	-0.09	-0.07	-0.11	-0.1	-0.08	-0.08	-0.08	-0.07	-0.07	-0.06	-0.06
-0.5	0.47	0.58	2.71	4.36	4.64	4.44	4.04	4.08	4.2	3.35	2.71	1.57	0.84	-0.1	-0.88	-1.02	-0.74	-0.58	-0.38	-0.4	-0.32	-0.21	-0.12	-0.1	-0.09	-0.12	-0.18	-0.16	-0.14	-0.08	-0.06	-0.13	-0.09	-0.07	-0.06	-0.08	-0.09	-0.1	-0.05	-0.07	-0.1	-0.08	-0.05	-0.07	-0.09	-0.06	-0.07	-0.05	-0.06
-0.45	0.11	0.53	2.2	4.26	4.08	4.25	4.62	5.19	6.16	5.79	5.36	4.41	2.58	1.44	1.14	0.52	0.53	0.27	0.02	-0.02	-0.11	-0.06	-0.08	-0.04	-0.05	-0.08	-0.14	-0.16	-0.12	-0.09	-0.06	-0.12	-0.06	-0.06	-0.07	-0.1	-0.12	-0.11	-0.08	-0.06	-0.13	-0.08	-0.06	-0.09	-0.07	-0.08	-0.05	-0.05	-0.07
-0.4	0.3	0.65	1.6	2.87	3.05	3.28	4.04	4.52	6.26	7.53	7.9	6.31	4.99	2.62	2.11	1.68	1.4	0.6	0.95	0.54	0.45	0.52	0.12	0	-0.04	-0.07	-0.13	-0.17	-0.11	-0.11	-0.08	-0.13	-0.08	-0.13	-0.07	-0.1	-0.11	-0.09	-0.06	-0.08	-0.12	-0.12	-0.11	-0.1	-0.06	-0.09	-0.04	-0.02	-0.05
-0.35	0.11	0.34	-0.87	-0.45	0.07	1.39	1.96	3.03	5.05	7.3	8.85	8.95	7.08	4.19	2	1.5	0.55	0.47	0.79	0.87	0.77	0.49	0.4	0.27	0.11	-0.05	-0.1	-0.24	-0.1	-0.1	-0.11	-0.1	-0.1	-0.07	-0.08	-0.07	-0.08	-0.08	-0.08	-0.07	-0.12	-0.1	-0.1	-0.07	-0.06	-0.07	-0.07	-0.07	-0.03
-0.3	-2.14	-3.39	-3.71	-3.58	-2.88	-2.08	-0.58	0.57	3.54	5.78	7.64	9.8	9.52	6.27	3.71	0.79	0.69	0.2	0.35	0.54	-0.05	-0.05	-0.08	0	0	0.1	-0.11	-0.32	-0.12	-0.1	-0.12	-0.11	-0.03	-0.08	-0.05	-0.08	-0.1	-0.1	-0.02	-0.1	-0.11	-0.1	-0.06	-0.05	-0.08	-0.09	-0.1	-0.06	-0.04
-0.25	-4.78	-6.07	-7.28	-6.52	-5.16	-4.27	-2.41	-0.79	1.78	4.09	6.09	8.42	10.17	8.31	5.39	1.47	0.6	0.23	0.2	-0.1	-0.12	-0.1	-0.1	-0.04	-0.01	-0.06	-0.14	-0.2	-0.2	-0.12	-0.15	-0.14	0.07	-0.06	-0.1	0.01	-0.04	-0.15	0.11	-0.2	-0.09	-0.09	-0.07	-0.06	-0.1	-0.11	-0.09	-0.09	-0.07
-0.2	-7.29	-8.58	-10.82	-9.33	-7.76	-6.73	-4.73	-3.06	-0.35	1.58	4.43	7.27	9.47	9.97	7.25	2.32	0.63	-0.18	0.31	0.18	0.27	-0.05	-0.06	-0.07	-0.03	-0.11	-0.18	-0.18	-0.11	-0.28	0.07	-0.11	-0.08	0.23	0	-0.02	0.12	-0.18	0.02	-0.11	-0.1	-0.1	-0.08	-0.07	-0.09	-0.06	-0.08	-0.09	-0.09
-0.15	-10.05	-12.67	-13.69	-12.43	-11	-8.95	-7.23	-5.34	-2.46	-0.66	2.61	5.58	7.97	10.49	8.03	3.02	0.82	0.68	0.69	0.26	0.2	0.22	0.36	-0.06	-0.05	-0.14	-0.22	0.3	0.04	-0.24	0.12	0.07	-0.12	-0.05	0.06	-0.11	0	0.02	-0.08	0.1	-0.15	0	-0.09	-0.08	-0.06	0.05	0.05	-0.08	-0.1
-0.1	-12.59	-15.57	-16.39	-14.26	-13.08	-11.58	-8.94	-7.1	-3.7	-1.87	0.77	3.76	7.18	9.95	8.55	3.56	0.55	0.77	0.76	0.5	0.23	-0.14	-0.15	-0.07	-0.1	-0.12	-0.25	-0.24	0.15	-0.04	-0.05	0.13	0.07	-0.12	0.27	-0.18	-0.1	0.3	-0.1	0.21	-0.18	0.15	-0.1	0	0.05	0.14	0.1	0.05	0
-0.05	-14.63	-19.19	-19.48	-17	-15.68	-14.23	-11.26	-8.46	-5	-3.35	0.14	2.74	6.13	9.58	8.71	3.9	0.36	0.9	0.8	0.54	0.5	0.39	-0.35	-0.08	-0.22	-0.2	-0.34	-0.36	0.26	0.15	-0.15	-0.12	0.36	-0.24	0.39	-0.16	-0.2	0.45	-0.14	0.25	-0.21	0.2	-0.03	0.2	-0.06	0.21	-0.08	0.1	0.1
0	-15.94	-20	-20	-18.95	-17.01	-14.68	-11.82	-8.73	-5.67	-3.54	-0.22	2.83	6.18	9.1	9.14	3.51	1.55	1.04	0.82	0.6	0.4	0.4	-0.3	-0.02	-0.33	-0.39	-0.43	-0.5	0.56	0.3	-0.32	-0.1	0.47	-0.33	0.41	-0.07	-0.28	0.37	-0.2	0.28	0.04	0.3	-0.12	0.23	-0.11	0.25	-0.09	0.01	0.18
0.05	-15.68	-19.49	-19.66	-18.94	-16.61	-14.19	-11.98	-8.64	-5.54	-3.66	0.23	3.06	6.21	8.97	9.26	3.73	0.54	0.94	0.87	0.62	0.37	0.42	-0.32	-0.06	-0.26	-0.3	-0.35	-0.32	0.28	0.1	-0.2	-0.1	0.27	-0.2	0.29	-0.1	-0.23	0.27	-0.19	0.2	0.06	0.18	-0.1	0.18	-0.06	0.19	-0.08	-0.02	0.12
0.1	-14.36	-17.09	-16.8	-16.1	-14.91	-12.75	-10.29	-7.79	-4.35	-2.19	0.98	3.91	6.76	9.55	8.8	4.05	-0.14	-0.4	0.63	0.45	0.33	0.33	0.45	-0.07	-0.14	-0.22	-0.27	-0.15	0.1	-0.05	-0.04	0.16	0.13	-0.15	0.15	-0.09	-0.08	0.25	-0.12	0.18	-0.2	0.12	-0.09	0.02	0.03	0.11	0.14	0.1	0
0.15	-12.12	-14.51	-13.61	-13.43	-12.06	-9.8	-8.18	-6.02	-2.88	-0.4	2.38	4.49	7.34	9.96	8.01	3.63	0.17	-0.49	0.7	0.35	0.19	0.4	0.35	-0.06	-0.11	-0.16	-0.2	0.35	-0.05	-0.24	0.1	0.04	-0.14	-0.05	0.08	-0.09	0	0.06	-0.04	0.19	-0.18	-0.12	0.02	-0.08	-0.06	0.02	0.09	0.08	-0.06
0.2	-8.58	-11.38	-10.53	-10.52	-8.48	-7.55	-5.68	-3.93	-1.41	1.05	4.31	5.6	8.84	10.17	7.27	2.48	0.46	0.49	0.66	0.5	0.24	0.38	0.33	-0.08	-0.1	-0.1	-0.16	-0.25	-0.22	-0.3	-0.15	-0.12	-0.1	0.1	0.01	-0.06	0.1	-0.1	-0.01	0.1	-0.1	0.15	0.02	-0.1	-0.04	0	-0.08	0.03	-0.09
0.25	-6.03	-7.59	-7.65	-7.99	-6.13	-5.91	-3.42	-1.38	0.57	3.36	5.77	7.67	9.93	9.29	5.93	1.75	0.44	0.42	0.35	0.41	0.13	0.3	-0.25	-0.03	-0.05	-0.05	-0.12	-0.35	-0.15	-0.2	-0.17	-0.13	0.07	-0.03	-0.04	0.08	0.01	-0.15	0.1	-0.13	-0.06	-0.1	-0.06	-0.06	0.04	-0.1	-0.07	-0.08	-0.08
0.3	-3.56	-4.67	-4.58	-5.41	-3.95	-2.94	-1.51	0.07	2.7	4.95	6.89	9.42	9.21	7.15	4.28	0.98	0.42	0.5	0.6	0.42	0.3	-0.8	0.28	-0.01	-0.08	-0.1	-0.15	-0.18	-0.14	-0.16	-0.13	-0.08	-0.11	-0.1	-0.1	-0.11	-0.1	-0.13	-0.23	-0.1	-0.08	-0.08	-0.08	-0.05	-0.07	-0.12	-0.09	-0.09	-0.07
0.35	-0.79	-1.66	-1.43	-2.6	-1.59	-0.03	0.5	2.06	4.12	6.59	8.79	10.2	7.7	5.52	2.46	0.92	0.95	0.9	0.9	0.85	0.77	0.67	0.59	0.48	0.15	0.18	0.08	-0.12	-0.1	-0.15	-0.1	-0.07	-0.08	-0.08	-0.08	-0.1	-0.12	-0.13	-0.11	-0.15	-0.08	-0.09	-0.1	-0.07	-0.1	-0.1	-0.09	-0.06	-0.08
0.4	0.4	0.21	1.57	0.9	1.26	2.15	2.8	3.79	5.51	7.76	8.23	7.39	5.62	3.55	1.67	1.63	1.34	0.66	0.41	0.4	0.46	0.4	0.26	0	-0.06	-0.04	-0.07	-0.16	-0.08	-0.12	-0.06	-0.09	-0.11	-0.06	-0.07	-0.09	-0.12	-0.11	-0.08	-0.12	-0.1	-0.07	-0.06	-0.09	-0.08	-0.07	-0.08	-0.07	-0.04
0.45	0.16	0.64	2.1	3.16	3.68	3.4	4.41	5.33	6.37	6.77	6.18	5.27	3.3	2.17	1.58	1.07	0.8	0.2	-0.03	-0.08	0.16	-0.02	-0.05	-0.09	-0.09	-0.1	-0.12	-0.1	-0.09	-0.11	-0.08	-0.1	-0.09	-0.06	-0.06	-0.06	-0.11	-0.1	-0.1	-0.1	-0.09	-0.06	-0.07	-0.06	-0.07	-0.08	-0.06	-0.06	-0.05
0.5	0.24	0.74	2.55	4.35	4.07	4.02	4.85	4.59	5.14	4.55	4.17	2.33	1.09	0.35	-0.58	-0.68	-0.55	-0.56	-0.4	-0.36	-0.16	-0.18	-0.16	-0.14	-0.15	-0.13	-0.15	-0.13	-0.11	-0.11	-0.07	-0.09	-0.07	-0.07	-0.08	-0.05	-0.07	-0.08	-0.09	-0.08	-0.07	-0.05	-0.08	-0.05	-0.08	-0.07	-0.05	-0.05	-0.06
0.55	0.1	0.7	1.49	3.44	3.45	2.35	2.94	2.7	2.54	2.12	0.78	-0.34	-0.68	-1.21	-1.3	-1.72	-1.12	-0.8	-0.5	-0.33	-0.28	-0.23	-0.16	-0.13	-0.15	-0.2	-0.16	-0.14	-0.1	-0.08	-0.07	-0.08	-0.06	-0.08	-0.07	-0.08	-0.08	-0.07	-0.07	-0.06	-0.05	-0.07	-0.08	-0.06	-0.07	-0.08	-0.05	-0.05	-0.07
0.6	0.39	0.58	0.95	2.54	2.31	1.53	1.54	0.71	0.18	-0.2	-0.52	-0.82	-0.94	-1.17	-0.87	-0.9	-0.61	-0.5	-0.3	-0.2	-0.13	-0.11	-0.09	-0.1	-0.2	-0.18	-0.15	-0.11	-0.11	-0.09	-0.08	-0.08	-0.07	-0.06	-0.06	-0.08	-0.07	-0.08	-0.07	-0.06	-0.06	-0.07	-0.07	-0.06	-0.07	-0.08	-0.07	-0.06	-0.06
Y(m)
Note: Initial bed elevations are substracted.
[truncated: 11 more columns]

## Sheet: Diameter
CS1(x=0.4m)					L0(y=0m)
Y(m)	Pg	Ps			X(m)	Pg	Ps
-0.55	0.74	0.26			0.05	0.66	0.34
-0.45	0.61	0.39			0.15	0.88	0.12
-0.35	0.38	0.62			0.25	0.92	0.08
-0.25	0.65	0.35			0.35	0.96	0.04
-0.15	0.86	0.14			0.45	0.98	0.02
-0.05	0.97	0.03			0.55	0.97	0.03
0.05	0.98	0.02			0.65	0.98	0.02
0.15	0.76	0.24			0.75	0.96	0.04
0.25	0.4	0.6			0.85	0.97	0.03
0.35	0.61	0.39			0.95	0.96	0.04
0.45	0.78	0.22			1.05	0.96	0.04
0.55	0.89	0.11			1.15	0.95	0.05
					1.25	0.93	0.07
					1.35	0.87	0.13
					1.45	0.9	0.1
CS2(x=1.3m)					1.55	0.95	0.05
Y(m)	Pg	Ps			1.65	0.92	0.08
-0.55	0.8	0.2			1.75	0.76	0.24
-0.45	0.9	0.1			1.85	0.55	0.45
-0.35	0.96	0.04			1.95	0.61	0.39
-0.25	0.98	0.02			2.05	0.67	0.33
-0.15	0.97	0.03			2.15	0.62	0.38
-0.05	0.88	0.12			2.25	0.65	0.35
0.05	0.9	0.1			2.35	0.61	0.39
0.15	0.96	0.04			2.45	0.58	0.42
0.25	0.97	0.03			2.55	0.65	0.35
0.35	0.99	0.01			2.65	0.68	0.32
0.45	0.95	0.05			2.75	0.7	0.3
0.55	0.86	0.14			2.85	0.77	0.23
					2.95	0.88	0.12
					3.05	0.6	0.4
					3.15	0.65	0.35
CS3(x=3.1m)					3.25	0.9	0.1
Y(m)	Pg	Ps			3.35	0.62	0.38
-0.55	0.8	0.2			3.45	0.89	0.11
-0.45	0.77	0.23			3.55	0.7	0.3
-0.35	0.75	0.25			3.65	0.64	0.36
-0.25	0.71	0.29			3.75	0.92	0.08
-0.15	0.8	0.2			3.85	0.63	0.37
-0.05	0.51	0.49			3.95	0.77	0.23
0.05	0.58	0.42			4.05	0.95	0.05
0.15	0.63	0.37			4.15	0.66	0.34
0.25	0.83	0.17			4.25	0.7	0.3
0.35	0.67	0.33			4.35	0.93	0.07
0.45	0.71	0.29			4.45	0.66	0.34
0.55	0.75	0.25			4.55	0.86	0.14
					4.65	0.68	0.32
					4.75	0.72	0.28
					4.85	0.86	0.14
CS4(x=4.0m)					4.95	0.71	0.29
Y(m)	Pg	Ps			5.05	0.79	0.21
-0.55	0.67	0.33			5.15	0.81	0.19
-0.45	0.74	0.26			5.25	0.83	0.17
-0.35	0.78	0.22			5.35	0.68	0.32
-0.25	0.7	0.3			5.45	0.8	0.2
-0.15	0.8	0.2			5.55	0.7	0.3
-0.05	0.9	0.1			5.65	0.78	0.22
0.05	0.94	0.06			5.75	0.75	0.25
0.15	0.78	0.22			5.85	0.78	0.22
0.25	0.67	0.33			5.95	0.75	0.25
0.35	0.74	0.26
0.45	0.76	0.24
0.55	0.8	0.2
Note: Pg is the proportion of gravel while Ps is the proportion of sand.
